1 **Evolutionary recent dual obligatory symbiosis among adelgids**  
2 **indicates a transition between fungus and insect associated lifestyles**

3 Gitta Szabó<sup>1,2,\*</sup>, Frederik Schulz<sup>1,3</sup>, Alejandro Manzano-Marín<sup>1</sup>, Elena Rebecca  
4 Toenshoff<sup>1,4</sup>, Matthias Horn<sup>1</sup>

5  
6 <sup>1</sup>Centre for Microbiology and Environmental Systems Science, University of Vienna,  
7 Vienna, Austria

8 <sup>2</sup>Current address: Department of Internal Medicine and Oncology, Semmelweis  
9 University, Budapest, Hungary

10 <sup>3</sup>Current address: US Department of Energy (DOE) Joint Genome Institute, Berkeley,  
11 California, USA

12 <sup>4</sup>Current address: Institute of Molecular Biology and Biophysics, ETH Zurich, Zurich,  
13 Switzerland

14

15 \* Corresponding author

16

17

18 **Running title:** Evolutionary transition between fungus and insect endosymbionts

19

20 **Competing Interests:** The authors declare no competing interests

21

22 **Corresponding author:** Gitta Szabó; Email: [gitta.szabo@yahoo.com](mailto:gitta.szabo@yahoo.com)

23

24 **ABSTRACT**

25 Adelgids (Insecta: Hemiptera: Adelgidae) form a small group of insects but  
26 harbor a surprisingly diverse set of bacteriocyte-associated endosymbionts, which  
27 suggest multiple replacement and acquisition of symbionts over evolutionary time.  
28 Specific pairs of symbionts have been associated with adelgid lineages specialized on

29 different secondary host conifers. Using a metagenomic approach, we investigated the  
30 symbiosis of the *Adelges laricis/tardus* species complex containing  
31 betaproteobacterial (*Candidatus Vallotia tarda*) and gammaproteobacterial  
32 (*Candidatus Profftia tarda*) symbionts. Genomic characteristics and metabolic  
33 pathway reconstructions revealed that *Vallotia* and *Profftia* are evolutionary young  
34 endosymbionts, which complement each other's role in essential amino acid  
35 production. Phylogenomic analyses and a high level of genomic synteny indicate an  
36 origin of the betaproteobacterial symbiont from endosymbionts of *Rhizopus* fungi.  
37 This evolutionary transition was accompanied with substantial loss of functions  
38 related to transcription regulation, secondary metabolite production, bacterial defense  
39 mechanisms, host infection and manipulation. The transition from fungus to insect  
40 endosymbionts extends our current framework about evolutionary trajectories of host-  
41 associated microbes.  
42

## 43 **Introduction**

44 Plant-sap feeding insects harbor bacterial endosymbionts, which are of great  
45 importance in their host ecology and serve as a model for studying microbe-host  
46 relationships and genome evolution of host restricted bacteria (1–3). Adelgids  
47 (Insecta: Hemiptera: Adelgidae) live on Pinaceae conifers and feed on phloem sap or  
48 parenchyma cells (4,5). The group has nearly seventy species and is sister to the  
49 families of phylloxerans (Phylloxeridae) and aphids (Aphididae) within the suborder  
50 Sternorrhyncha (6). Some adelgid species, such as the balsam woolly adelgid  
51 (*Adelges piceae*) and the hemlock woolly adelgid (*A. tsugae*) are well-known forest  
52 pests and represent severe threats to firs and hemlocks (7,8).

53 Adelgids have a complex multigenerational life cycle, which typically  
54 involves sexual generations and an alternation between spruce (*Picea*), which is the  
55 primary host, and another, secondary conifer host (*Abies*, *Pinus*, *Larix*, *Pseudotsuga*,  
56 or *Tsuga*). However, other adelgids reproduce asexually in all generations on either of  
57 the host genera (5).

58 Similarly to other plant-sap feeding insects, adelgids harbor maternally  
59 inherited bacterial symbionts within specialized cells, so-called bacteriocytes, which  
60 form a large bacteriome in the abdomen (9–14). Although the function of these  
61 bacterial partners remains largely unexplored, they are expected to provide essential  
62 amino acids and B vitamins scarce in the plant sap diet, similarly to obligate  
63 endosymbionts of other plant-sap feeding insects (2,15). Besides these obligate  
64 nutritional endosymbionts, non-essential facultative symbionts might also occur  
65 within the bacteriome (or in other tissues), which can provide selective fitness  
66 benefits to insects such as protection against parasites and fungal pathogens, increased

67 heat tolerance, or expansion of host plant range (16–18). Similarly to obligate  
68 mutualists, facultative symbionts are usually maternally inherited, but can also spread  
69 horizontally within and between insect species via mating (19), parasites (20), and  
70 food source such as plant tissues (21). Few examples of newly emerged bacteriocyte-  
71 associated symbionts of herbivorous insects pinpoint their source from plant-  
72 associated bacteria, such as *Erwinia* in *Cinara* aphids (22), gut bacteria, such as  
73 cultivable *Serratia symbiotica* strains colonizing the gut of *Aphis* aphids (23), and  
74 other free-living bacteria such as a *Sodalis* strain (HS) isolated from human wounds  
75 and being akin to primary endosymbionts of *Sitophilus* weevils (24).

76 Interestingly, two types of bacteriocyte-associated symbionts have been  
77 identified in all populations and life stages of most adelgid species (9–14). These  
78 symbionts belong to at least six different lineages within the Gammaproteobacteria or  
79 the Betaproteobacteria. *A. tsugae* populations also contain a universal *Pseudomonas*  
80 symbiont free in the hemocoel together with the bacteriocyte-associated symbionts  
81 (9,10,25). Remarkably, specific pairs of symbionts correspond to distinct lineages of  
82 adelgids specialized to one of the five secondary host tree genera (10,14). A  
83 gammaproteobacterial symbiont lineage involving ‘*Candidatus Annandia*  
84 adelgestsugas’ and ‘*Candidatus Annandia pinicola*’ (hereafter *Annandia*), is present in  
85 both *A. tsugae* and *Pineus* species, and was likely already associated with ancestral  
86 adelgids before diversification into the two major adelgid lineages, *Adelges* and  
87 *Pineus*, over 87 million years ago (5,9,10,14). Nevertheless, this putatively ancient  
88 symbiont lineage is missing from other adelgids, and the high diversity of symbionts  
89 within this small group of insects suggests an evolutionary history involving multiple  
90 acquisitions and replacement of bacterial partners (10,13,14). This is in sharp contrast

91 to the case in the aphid sister group, where most species have tightly co-evolved with  
92 a single obligate symbiont, *Buchnera aphidicola*, for over 180 million years (2). In the  
93 case of adelgids, it has been postulated that loss of the ancestral nutritional symbiont  
94 lineage and repeated replacements of bacterial partners might be due to fluctuating  
95 selective pressure on essential symbiotic functions during evolution as a consequence  
96 of repeated emergence of host-alternating lifestyles and feeding on nutrient-rich  
97 parenchyma versus nutrient-poor phloem on the primary and secondary host trees,  
98 respectively (10,25).

99 To date, whole genome sequences of adelgid endosymbionts are available for  
100 only one species: the hemlock woolly adelgid, *A. tsugae*. Metabolic potential and  
101 genomic characteristics of *Annandia* resemble those of long-term obligate  
102 intracellular symbionts. However, *Annandia* has lost many genes in essential amino  
103 acid synthesis. The accompanying, evolutionary more recent, *Pseudomonas* symbiont  
104 can complement these missing capabilities and thus has a co-obligatory status in  
105 maintaining the symbiosis (25). In addition to this obligate dual endosymbiotic  
106 system, analysis of a genome fragment of a gammaproteobacterial symbiont  
107 (*Candidatus* Steffania adelgidicola) of the *Adelges nordmannianae/piceae* species  
108 complex revealed a metabolically versatile, putatively evolutionary young  
109 endosymbiont in this adelgid lineage (12). Further genomic data on the symbionts  
110 would help to infer the history of association of adelgids with distinct bacterial  
111 groups.

112 Here, we investigate the bacterial symbionts of the *A. laricis/tardus* species  
113 complex using a metagenomic approach and ask what is the function and putative  
114 origin of the dual symbiosis in this lineage of adelgids. *A. laricis* and *A. tardus* are

115 morphologically and genetically hardly distinguishable species of adelgids (4,26).  
116 They contain betaproteobacterial and gammaproteobacterial symbionts, ‘*Candidatus*  
117 *Vallotia tarda*’ and ‘*Candidatus Profftia tarda*’ (hereinafter *Vallotia* and *Profftia*),  
118 respectively. Both symbionts are rod-shaped and are located intermingled inside the  
119 same bacteriocytes. *Profftia*-related symbionts have only been found in larch-  
120 associated, while *Vallotia* symbionts occur in both larch and Douglas-fir-associated  
121 lineages of adelgids. Although host-symbiont co-speciation could not be fully  
122 resolved with confidence yet, the dual obligatory status of *Profftia* and *Vallotia* in the  
123 symbiosis seems to be possible given their common occurrence across different  
124 populations and life stages of adelgids (10,13).

125 Our results demonstrate that both bacteriocyte-associated symbionts are  
126 evolutionary recent partners of adelgids complementing each other's role in essential  
127 amino acid biosynthesis. Notably, phylogenomic analyses revealed a close  
128 relationship of *Vallotia* with endosymbionts of *Rhizopus* fungi. Detailed analysis of  
129 genomic synteny and gene content indicated an evolutionary transition from fungus to  
130 insect symbiosis accompanied by a substantial loss of functions in the insect symbiont  
131 especially in transcription regulation, secondary metabolite production, host infection  
132 and manipulation.

## 133 **Materials and Methods**

### 134 **Sampling**

135 Spruce (*Picea*) branches with galls of adelgids (4) were collected near  
136 Klausen-Leopoldsdorf, Austria (Figure S1). Galls were stored at -80°C in the lab for  
137 subsequent genomic DNA isolation.

## 138 **DNA isolation**

139           Before DNA isolation, adelgids were collected from the galls using teasing  
140 needles. The insects were washed twice in buffer A + EDTA solution (35mM Tris-  
141 HCl, 250 mM sucrose, 25 mM KCl, 10 mM MgCl<sub>2</sub>, 250 mM EDTA; pH 7.5) and  
142 were subsequently homogenized in fresh solution with a plastic pestle. The  
143 suspension was then sequentially filtered through 53 and 30 µm pore size meshes and  
144 5 µm membrane syringe filters. Samples were centrifuged at 7,000 rpm for 5 min at  
145 4°C and supernatants were discarded. Pellets were re-suspended in buffer A and  
146 centrifuged again at 7,000 rpm for 5 min at 4°C. This washing step was repeated once  
147 and pellets were next re-suspended in 1xTE buffer (10 mM Tris-HCl, 1 mM EDTA;  
148 pH 7.5). High-molecular-weight DNA was isolated by an SDS-based DNA extraction  
149 method using 1% cetyltrimethylammonium bromide and 1.5% polyvinylpyrrolidone  
150 in the extraction buffer (27). DNA samples were stored at -20°C.

## 151 **Sequencing and genome assembly**

152           A paired-end library was sequenced on a HighSeq 2000 Illumina sequencer.  
153 Sequencing reads were quality filtered and trimmed with PRINSEQ (28), and were  
154 assembled with SPAdes v3.1 (29). Using a subset of 30 million read pairs, a single  
155 contig representing the circular *Profftia* chromosome was obtained with 52-fold  
156 coverage, while the assembly of the *Vallotia* genome remained fragmented probably  
157 due to repetitive sequences. To improve this assembly, reads were mapped on the  
158 *Profftia* genome using the Burrows-Wheeler Alignment (BWA) tool and the BWA-  
159 MEM algorithm (30), and matching sequences were removed from further analysis. A  
160 novel assembly with the remaining reads resulted in 14 contigs longer than 1000 bp.

161 These contigs were further analyzed against a custom protein database containing  
162 single-copy markers found in 99% of prokaryote genomes using blastx (31) and  
163 phylogenetic information of the best hits was assessed in Megan v4.70.4 (32).  
164 Ribosomal RNAs were inferred by RNAmmer (33). Based on these, eight contigs  
165 belonging to the *Vallotia* genome were identified. Seven contigs represent the *Vallotia*  
166 chromosome with ~212-fold coverage. In addition, a single contig obtained with 169-  
167 fold coverage corresponds to a putative circular plasmid of this endosymbiont. The  
168 remaining contigs, all shorter than 5,500 bp, were judged to belong to unrelated taxa,  
169 based on differences in GC content, coverage and taxonomic affiliation of best blastx  
170 hits in the NCBI non-redundant protein database (nr).

#### 171 **Genome analysis**

172 The putative origin of replication was identified with GenSkew  
173 (<http://genskew.csb.univie.ac.at/>). We used the ConsPred genome annotation pipeline  
174 for gene prediction and annotation (34). Genome annotations were curated with the  
175 help of the UniPro UGENE software (35). We identified pseudogenes by using the  
176 intergenic and hypothetical protein regions as queries in blastx searches against nr and  
177 the UniProt Swiss-Prot database with an e-value < 1e-3 confidence threshold.  
178 Pseudogenes were identified as remains of genes, which were either truncated (having  
179 a length < 80% of the reference) or were interrupted by internal stop codons and/or  
180 frameshift mutations. Pseudogene coordinates were set according to the best blast hit  
181 in the UniProt Swiss-Prot database, if applicable.

182 The presence of mobile genetic elements was inferred with blastn and blastx  
183 searches against the ISfinder database (36). Metabolic pathways were explored with



184 the help of the Ecocyc, Biocyc, and Metacyc databases (37) and the Pathway Tools  
185 software (38). Orthologous proteins shared by the relevant genomes or unique to  
186 either of the symbionts were identified by using OrthoMCL with a 1e-5 e-value  
187 threshold (39). Distribution of the predicted proteins among the main functional  
188 categories was explored by using eggNOG-mapper v2 (40,41) with the DIAMOND  
189 sequence comparison option and a 1e-3 e-value threshold (42). Genome alignments  
190 were performed by Mauve (43). The *Vallotia* contigs were reordered using the  
191 chromosome and plasmid sequences of the closely related fungus endosymbiont,  
192 *Mycetohabitans rhizoxinica*, as references (accession numbers: FR687359 and  
193 FR687360, respectively). Collinear genomic regions and genome rearrangements  
194 were visualized by Circos based on single-copy shared genes (44). A close-up of  
195 syntenic regions was created by using the Easyfig tool (45). The assembled genomes  
196 have been submitted to European Nucleotide Archive under accession number  
197 [submission in process, to be added].

## 198 **Phylogenetic analyses**

199 A phylogenomic approach was used to infer the phylogenetic positions of the  
200 endosymbionts. Protein sequences of closely related species within the  
201 Burkholderiales and the Enterobacteriales were collected from the Assembly database  
202 of NCBI. Single copy marker genes were identified by Phyla-AMPHORA (46) using  
203 the Brandon Seah (2014) Phylogenomics-tools (online:  
204 <https://github.com/kbseah/phylogenomics-tools>). Individual sets of genes were  
205 aligned with Muscle 3.8.31 (47). Poorly aligned positions were removed with Gblocks  
206 0.91b (48) using default parameters apart from the following settings: allowed gap

207 positions with half, the minimum length of a block was 5. Alignments of 108 and 45  
208 proteins were concatenated and used for the calculation of phylogenetic trees for  
209 *Vallotia* and *Profftia*, respectively.

210 For both endosymbionts, we generated maximum likelihood trees with IQ-  
211 TREE after selecting the best-fit substitution models with ModelFinder as available at  
212 <http://iqtree.cibiv.univie.ac.at> (49–51). SH-like approximate likelihood ratio test (SH-  
213 aLRT) and ultrafast bootstrap support values, both based on 1000 iterations, were  
214 calculated (52). The best-fit models were LG+F+R5 and LG+R5 for the *Vallotia* and  
215 *Profftia* tree, respectively. Besides, Bayesian phylogenetic analyses were performed  
216 by MrBayes 3.2.7a (53) with the LG+I+G model and 4 gamma categories on the  
217 CIPRES Science Gateway v.3.3. web interface (54). Two runs, each with 4 chains  
218 were performed until convergence diagnostics fell below 0.01. A 50% majority  
219 consensus tree was created with a relative burn-in of 25%.

220

## 221 **Results and discussion**

### 222 ***Vallotia* and *Profftia* are evolutionary young symbionts of adelgids**

#### 223 ***Intermediate states of genome reduction***

224 The complete sequence of the *Profftia* chromosome had a length of 1,225,795  
225 bp and a G+C content of 31.9% (Table 1). It encoded for 645 proteins, one copy of  
226 each rRNA, 35 tRNAs, and 10 ncRNAs. It had tRNAs and amino acid charging  
227 potential for all 20 standard amino acids. However, protein-coding sequences made  
228 up only 52.4% of the genome, and 21 pseudogenes indicated an ongoing gene  
229 inactivation.

230           Currently, eight contigs with a total length of 1,183,315 bp represent the  
231 *Vallotia* genome. Seven contigs had an average G+C content and a coding density of  
232 42.8% and 65.5%, respectively. However, a 72,431 bp long contig showed a  
233 characteristically lower G+C content (36.1%) and contained only 46.2% putative  
234 protein coding sequences (CDSs). This contig had identical repeats at its ends, and  
235 genome annotation revealed neighboring genes for a plasmid replication initiation  
236 protein, and ParA/ParB partitioning proteins, which function in plasmid and  
237 chromosome segregation between daughter cells before cell division (55). We thus  
238 assume that this contig corresponds to a circular plasmid of *Vallotia*. The 16S rRNA  
239 and the 5S plus 23S rRNA genes were encoded on two small contigs in the *Vallotia*  
240 assembly (1976 and 3571 bp, respectively) and were covered by nearly three times  
241 more sequence reads than the rest of the chromosomal contigs. This implies that  
242 *Vallotia* has three copies of each rRNA, similarly to its closest relative for which a  
243 complete genome sequence is available, *Mycetohabitans rhizoxinica* (56). In total, the  
244 *Vallotia* genome encoded for 780 proteins (29 on the putative plasmid), 37 tRNAs,  
245 and 52 predicted pseudogenes (5 on the putative plasmid).

246           The host-restricted lifestyle has a profound influence on bacterial genomes.  
247 Living in a stable, nutrient-rich niche relaxes purifying selection on many redundant  
248 functions, and small effective population size of the symbionts increases genetic drift.  
249 These can lead to the accumulation of slightly deleterious mutations, a proliferation of  
250 mobile genetic elements, and gene inactivation (57–60). Non-functional genomic  
251 regions and mobile genetic elements get subsequently lost, and ancient obligate  
252 endosymbionts typically have tiny ( $\ll 0.8$  Mb), gene dense and stable genomes with  
253 AT-biased nucleotide composition (2,61,62). Facultative symbionts also possess

254 accelerated rates of sequence evolution but have larger genomes (>2Mb) with variable  
255 coding densities following the age of their host-restricted lifestyle (63). The only  
256 moderately reduced size and AT bias together with the low protein-coding density of  
257 the *Vallotia* and *Profftia* genomes was most similar to those of evolutionary young  
258 co-obligate partners of insects (63), for instance ‘Ca. *Pseudomonas adelgestugas*’ in  
259 *A. tsugae* (25), *Serratia symbiotica* in *Cinara cedri* (64,65) and the *Sodalis*-like  
260 symbiont of *Philaenus spumarius*, the meadow spittlebug (66). However, compared to  
261 these systems involving a more ancient and a younger symbiont, similar genome  
262 characteristics of *Vallotia* and *Profftia* implied that both bacteria are evolutionarily  
263 recent symbionts in a phase of extensive gene inactivation typical for early stages of  
264 adaptation to an obligate host-restricted life-style (59,60).

#### 265 ***Differential reduction of metabolic pathways***

266 Although compared to their closest free-living relatives both *Vallotia* and  
267 *Profftia* have lost many genes in all functional categories, both retained a greater  
268 proportion of genes in translation-related functions and cell envelope biogenesis  
269 (Figures S2, S3). High retention of genes involved in central cellular functions such as  
270 translation, transcription, and replication is a typical feature of reduced genomes, even  
271 extremely tiny ones of long-term symbionts (62). However, ancient intracellular  
272 symbionts usually miss a substantial number of genes for the production of the cell  
273 envelope and might rely on host-derived membrane compounds (67–69).

274 Based on pathway reconstructions, both *Vallotia* and *Profftia* had a complete  
275 gene set for peptidoglycan, fatty acid, phospholipid biosynthesis, and retained most of  
276 the genes for the production of lipid A, LPS core, and the Lpt LPS transport  
277 machinery. Besides, we found a partial set of genes for O antigen biosynthesis in the

278 *Vallotia* genome. Regarding the membrane protein transport and assembly, both  
279 adelgid endosymbionts had the necessary genes for Sec and signal recognition particle  
280 (SRP) translocation, and the BAM outer membrane protein assembly complex.  
281 *Profftia* also had a complete Lol lipoprotein trafficking machinery (lolABCDE),  
282 which can deliver newly matured lipoproteins from the inner membrane to the outer  
283 membrane (70). Besides, *Profftia* had a near-complete gene set for the Tol-Pal  
284 system, however, *tola* has been pseudogenized suggesting an ongoing reduction of  
285 this complex. In addition, both adelgid endosymbionts have retained *mrDAB* and  
286 *mreBCD* having a role in the maintenance of cell wall integrity and morphology  
287 (71,72). The observed well-preserved cellular functions for cell envelope biogenesis  
288 and integrity are consistent with the rod-shaped cell morphology of *Profftia* and  
289 *Vallotia* (13), contrasting the spherical/pleomorphic cell shape of ancient  
290 endosymbionts, such as *Annandia* in *A. tsugae* and *Pineus* species (9,10,14).

291       Regarding the central metabolism, *Vallotia* lacks 6-phosphofruktokinase, but  
292 has a complete gene set for gluconeogenesis and the tricarboxylic acid (TCA) cycle  
293 cycle. TCA cycle genes are typically lost in long-term symbionts but are present in  
294 facultative and evolutionary recent obligate endosymbionts (66,73,74). *Vallotia* does  
295 not have any sugar transporter genes, similarly to its close relative, the fungus  
296 symbiont *M. rhizoxinica* (56). A glycerol kinase gene next to a putative glycerol  
297 uptake facilitator protein is present on its plasmid, however, it has a frameshift  
298 mutation and a premature stop codon in the first 40% of the sequence and whether it  
299 can still produce a functional protein remains unknown.

300       *Profftia* can convert acetyl-CoA to acetate for energy but lacks TCA cycle  
301 genes, a feature characteristic to more reduced genomes, such, for instance, *Annandia*

302 in *A. tsugae* (25). *Profftia* has import systems for a variety of organic compounds,  
303 such as murein tripeptides, phospholipids, thiamine, spermidine, and putrescine and 3-  
304 phenylpropionate and two complete phosphotransferase systems for the uptake of  
305 sugars. NADH dehydrogenase, ATP synthase, and cytochrome oxidases (*bo/bd-1*) are  
306 encoded on both adelgid symbiont genomes.

307 *Profftia* retained more functions in inorganic ion transport and metabolism,  
308 while *Vallotia* had a characteristically higher number of genes related to amino acid  
309 biosynthesis (see its function below) and nucleotide transport and metabolism  
310 (Figures S2, S3). For instance, *Profftia* can take up sulfate and use it for assimilatory  
311 sulfate reduction and cysteine production, and it has also retained many genes for  
312 heme biosynthesis. However it cannot produce inosine-5-phosphate (5'-IMP) and  
313 uridine 5'-monophosphate (5'-UMP) precursors for the *de novo* synthesis of purine  
314 and pyrimidine nucleotides thus would need to import these compounds.

315 Taken together their moderately reduced, gene-sparse genomes but still  
316 versatile metabolic capabilities support that *Vallotia* and *Profftia* are both in an  
317 intermediate stage of genome erosion and functional reduction similar to evolutionary  
318 recently acquired endosymbionts.

319

## 320 ***Vallotia* and *Profftia* are both obligatory nutritional symbionts**

### 321 ***Complementary functions in essential amino acid provision***

322 *Vallotia* and *Profftia* complement each other's role in the essential amino acid  
323 synthesis, thus have a co-obligatory status in the *A. laricis/tardus* symbiosis (Figure  
324 1). Although *Vallotia* likely generates most essential amino acids, it can not provide

325 phenylalanine and tryptophan on its own. Solely, *Profftia* can produce chorismate, a  
326 key precursor for the synthesis of both amino acids. *Profftia* is likely responsible for  
327 the complete biosynthesis of phenylalanine as it has a full set of genes for this  
328 pathway. It can also convert chorismate to anthranilate, however further genes for  
329 tryptophan biosynthesis are only present in the *Vallotia* genome. Thus *Vallotia* likely  
330 takes up anthranilate for tryptophan biosynthesis. Anthranilate synthase (trpEG), is a  
331 subject to negative feedback regulation by tryptophan (75), thus partition of this rate-  
332 limiting step between the co-symbionts can enhance overproduction of the amino acid  
333 and might stabilize dual symbiotic partnerships at an early stage of coexistence. The  
334 production of tryptophan is partitioned between *Vallotia* and *Profftia* similarly as seen  
335 in other insect symbioses such as between *Buchnera* and *Serratia symbiotica* in co-  
336 obligatory partnerships in aphids (64,65) and between *Carsonella* and certain co-  
337 symbionts in psyllids (76). The tryptophan biosynthesis is also shared but is more  
338 redundant between the *Annandia* and *Pseudomonas* symbionts of *A. tsugae* (25). This  
339 association generally shows a higher level of functional overlap between the  
340 symbionts than the *Vallotia* - *Profftia* system, as redundant genes are present also in  
341 phenylalanine, threonine, lysine, and arginine synthesis in the *A. tsugae* symbiosis.  
342 Besides, the *Vallotia* - *Profftia* consortium is also more unbalanced than the *A. tsugae*  
343 system where *Annandia* can produce seven and the *Pseudomonas* partner five  
344 essential amino acids with the contribution of host genes (25).

345         The *Vallotia* genome encodes for all the enzymes for the synthesis of five  
346 essential amino acids (histidine, leucine, valine, lysine, threonine). Among the  
347 essential amino acid synthesis related genes, *argG* and *tyrB* of *Vallotia* are only  
348 present on the plasmid, which might have contributed to its maintenance in the

349 genome. However, neither of the endosymbionts can produce ornithine, 2-  
350 oxobutanoate and homocysteine *de novo*, which are key for the biosynthesis of  
351 arginine, isoleucine and methionine, respectively. *metC* and *argA* are still present as  
352 pseudogenes in *Vallotia* suggesting a recent loss of these functions in methionine and  
353 arginine biosynthesis, respectively. The corresponding functions are also missing  
354 from the *Annandia - Pseudomonas* system (Weglarz et al., 2018). Ornithine, 2-  
355 oxobutanoate, and homocysteine are thus likely supplied by the insect host, as seen for  
356 instance in aphids, mealybugs, and psyllids, where the respective genes encoding for  
357 cystathionine gamma and beta lyases and insect ornithine aminotransferase are  
358 present in the insect genomes and are typically overexpressed within the bacteriome  
359 (68,77,78). However, we can not confirm the presence of relevant genes in the *A.*  
360 *laricis/tardus* genome, as our metagenome data were almost free from eukaryotic  
361 sequences.

362 *Vallotia* and *Profftia* have more redundant functions in non-essential amino  
363 acid production. Both symbionts can synthesize seven non-essential amino acids  
364 mostly through a series of amino-acid conversions (Figure 1). Only *Profftia* can  
365 produce cysteine and tyrosine, while none of the symbionts can build up glutamine  
366 thus this latter amino acid is likely supplied by the insect bacteriocytes.

367 The presence of amino acid transporters can complement missing functions in  
368 amino acid synthesis in the endosymbionts (Figure 1). For instance *Profftia* has a  
369 high-affinity glutamine ABC transporter, and three symporters (BrnQ, Mtr, TdcC),  
370 which can import isoleucine, leucine, valine, tryptophan, and threonine among the  
371 essential amino acids that can be produced by *Vallotia*. *Vallotia* might excrete  
372 isoleucine, valine, and leucine via AzICD, a putative branched-chain amino acid



373 efflux pump (79), and these amino acids could be taken up by *Profftia* via BrnQ and  
374 would be readily available also for the insect host.

### 375 ***B vitamin provision by Vallotia***

376 Regarding the B vitamin synthesis, *Vallotia* should be able to produce thiamine (B<sub>1</sub>),  
377 riboflavin (B<sub>2</sub>), pantothenate (B<sub>5</sub>), pyridoxine (B<sub>6</sub>), biotin (B<sub>7</sub>), and folic acid (B<sub>9</sub>)  
378 (Figure S4). Although *Vallotia* misses some genes of the canonical pathways,  
379 alternative enzymes and host-derived compounds might bypass these reactions, as  
380 detailed in the supplementary material. *Profftia* has only a few genes related to B  
381 vitamin biosynthesis. Three pseudogenes (*ribAEC*) in the riboflavin synthesis  
382 pathway indicate that these functions might have been lost evolutionary recently in  
383 this symbiont.

384 In summary, *Profftia* and *Vallotia* are both obligate nutritional endosymbionts  
385 of adelgids, however, *Vallotia* has a pivotal role in essential amino acid and B vitamin  
386 provision.

387

### 388 ***Profftia* and *Vallotia* are related to free-living bacteria and fungus** 389 **endosymbionts**

390 Previous 16S rRNA-based phylogenetic analyses suggested an affiliation of  
391 *Profftia* with free-living gammaproteobacteria and a close phylogenetic relationship  
392 between *Vallotia* and betaproteobacterial endosymbionts of *Rhizopus* fungi (13).  
393 Biased nucleotide composition and accelerated sequence evolution of endosymbiont  
394 genomes (2,3) often result in inconsistent phylogenies and may cause grouping of  
395 unrelated taxa (68,80,81). Thus to further investigate the phylogenetic relationships of

396 the *A. laricis/tardus* symbionts, we used conserved marker genes for maximum  
397 likelihood and Bayesian phylogenetic analyses.

398 Phylogenetic analysis of 45 single-copy proteins demonstrated that *Profftia*  
399 opens up a novel insect symbiont lineage most similar to *Hafnia* species and an isolate  
400 from the human gastrointestinal tract within the Hafniaceae, which has been recently  
401 designated as a distinct family within the Enterobacteriales (82) (Figure S5). *Hafnia*  
402 strains are frequently found in the gastrointestinal tract of humans and animals  
403 including insects, among others (83,84). The phylogenomic placement of *Profftia* in  
404 our analysis is in agreement with previous 16S rRNA based analyses (13).

405 *Vallotia* formed a monophyletic group with *Mycetohabitans endofungorum*  
406 and *M. rhizoxinica*, endosymbionts of *Rhizopus* fungi within the Burkholderiaceae  
407 (85,86) with strong support in phylogenetic analyses based on a concatenated set of  
408 108 proteins (Figures 2, S6; previous taxonomic assignments of the fungus  
409 endosymbionts were as *Burkholderia/Paraburkholderia endofungorum* and  
410 *rhizoxinica*, respectively). Interestingly, *Vallotia* and *M. endofungorum* appeared as  
411 well-supported sister taxa within this clade. This implies a closer phylogenetic  
412 relationship between *Vallotia* and *M. endofungorum*, and a common origin of adelgid  
413 endosymbionts from within a clade of fungus endosymbionts. Lengths of branches  
414 leading to the fungus endosymbionts were similar to those of free-living bacteria in  
415 the data set, however *Vallotia* had a remarkably longer branch marking a rapid rate of  
416 sequence evolution characteristic of obligate intracellular bacteria (2,3). *M.*  
417 *endofungorum* and *M. rhizoxinica* have been identified in the cytosol of the  
418 zygomycete *Rhizopus microsporus*, best known as the causative agent of rice seedling  
419 blight (86,87). The necrotrophic fungus secretes potent toxins, rhizoxin and rhizonin,

420 which are produced by the endosymbionts (86,88). The bacterial partners are  
421 obligatory for their host as they tightly control its sporulation, while they benefit from  
422 host nutrients and spread with the fungal spores (89,90). Additionally, related  
423 bacterial strains have also been found in association with *Rhizopus* fungi worldwide in  
424 a diverse set of environments, including other plant species, soil, food, and even  
425 human tissues (91–93).

426 Taken together, phylogenomic analyses support that *Profftia* and *Vallotia* open  
427 up novel insect symbionts lineages most closely related to free-living bacteria within  
428 the Hafniaceae and a clade of fungus endosymbionts within the Burkholderiaceae,  
429 respectively. Given the well supported phylogenetic positioning of '*Candidatus*  
430 *Vallotia tarda*' nested within a clade formed by *Mycetohabitans* species, we propose  
431 the transfer of '*Candidatus Vallotia tarda*' to the *Mycetohabitans* genus, as  
432 '*Candidatus Mycetohabitans vallotii*' (a detailed proposal for the re-classification is  
433 given in the supplementary material).

434

### 435 **The evolutionary link between *Vallotia* and fungus endosymbionts**

#### 436 ***High level of genomic synteny between *Vallotia* and *M. rhizoxinica****

437 The close phylogenetic relationship between *Vallotia* and *Rhizopus* symbionts  
438 offers a unique opportunity to gain insight into the early stages of genome reduction  
439 and to infer functional consequences of the partnerships of bacterial symbionts with  
440 insects and fungi, respectively. Among the *Rhizopus* endosymbionts, a closed genome  
441 is available for *M. rhizoxinica* (56). We therefore mostly focused on this fungus  
442 symbiont as a reference for comparison with *Vallotia*.

443           A surprisingly high level of synteny between the genomes of *Vallotia* and *M.*  
444 *rhizoxinica* provides further evidence for their shared ancestry. Seven contigs  
445 representing the *Vallotia* genome showed a high level of collinearity with the  
446 chromosome of *M. rhizoxinica* (Figure 3A). However, their cumulative size was only  
447 ~40% of the fungus endosymbiont chromosome. The contig that corresponded to a  
448 putative plasmid of *Vallotia* was perfectly syntenic with the larger of the two plasmids  
449 of *M. rhizoxinica* (pBRH01), although the *Vallotia* plasmid was over 90% smaller in  
450 size (72 431 bp vs. 822 304 bp) (56). Thus, the *Vallotia* plasmid showed a much  
451 higher level of reduction than the chromosome, which together with its lower G+C  
452 content and gene density suggest differential evolutionary constraints on these  
453 replicons. The observed high level of genome synteny between *Vallotia* and *M.*  
454 *rhizoxinica* genomes is consistent with the phylogenetic position of *Vallotia*  
455 interleaved within the clade of *Rhizopus* endosymbionts and points towards a direct  
456 evolutionary link between these symbioses and a symbiont transition between the  
457 fungus and insect hosts.

458           The conservation of genome structure contrasts with the elevated number of  
459 transposases and inactive derivatives making up ~6% of the fungus symbiont genome  
460 (56). Transition to a host-restricted lifestyle is usually followed by a sharp  
461 proliferation of mobile genetic elements coupled with many genomic rearrangement  
462 and gene inactivation. As seen for instance in endosymbionts of grain weevils (94),  
463 facultative and co-obligate *Serratia symbiotica* strains (95), and facultative  
464 endosymbionts, such as *Hamiltonella defensa* and *Regiella insecticola* in aphids (74).  
465 However, mobile genetic elements get subsequently purged out of the genomes of  
466 strictly vertically transmitted symbionts via a mutational bias towards deletion and

467 because of lack of opportunity for horizontal acquisition of novel genetic elements  
468 (59,61). In contrast to the fungus symbiont, mobile elements are notably absent from  
469 the *Vallotia* genome, suggesting that they might have been lost early after the  
470 establishment of the adelgid symbiosis conserving high collinearity between the  
471 fungus and adelgid symbiont genomes.

### 472 ***Shrinkage of the insect symbiont genome***

473 Deletion of large genomic fragments – spanning many functionally unrelated  
474 genes – represents an important driving force of genome erosion especially at early  
475 stages of symbioses when selection on many functions is weak (3,96). Besides, gene  
476 loss also occurs individually and is ongoing, albeit at a much lower rate, even in  
477 ancient symbionts with tiny genomes (62,97,98). Both small and large deletions could  
478 be seen when comparing the *Vallotia* and *M. rhizoxinica* genomes. Several small  
479 deletions as small as one gene were observed sparsely in the entire length of the  
480 *Vallotia* genome within otherwise syntenic regions. The largest genomic region  
481 missing from *Vallotia* encompassed 165 kbp on the *M. rhizoxinica* chromosome  
482 (Figure 3B). The corresponding intergenic spacer was only 3,843 bp long on the  
483 *Vallotia* genome between a phage shock protein and the Mfd transcription-repair-  
484 coupling factor, present both in *Vallotia* and *M. rhizoxinica*. Interestingly, this large  
485 genomic fragment included the large rhizoxin biosynthesis gene cluster  
486 (*rhiIGBCDHEF*), which is responsible for the production of rhizoxin, a potent  
487 antimitotic macrolide serving as a virulence factor for *R. microsporus*, the host of *M.*  
488 *rhizoxinica* (88). A homologous gene cluster is also present in *M. endofungorum* and  
489 *Pseudomonas fluorescens* and it has been suggested that the *rhi* cluster might have  
490 been horizontally acquired by *M. rhizoxinica* (56,88). Rhizoxin blocks microtubule

491 formation in various types of eukaryotic cells (88,99), thus lack of this gene cluster in  
492 ancestral *Vallotia* was likely a prerequisite for the establishment of the adelgid  
493 symbiosis. However, this large deleted genomic region also contained several  
494 transposases and many other genes, such as *argE* and *ilvA*, coding for the final  
495 enzymes for ornithine and 2-oxobutanoate productions, which were located adjacent  
496 to each other at the beginning of this fragment. The largest deletion between the  
497 plasmids encompassed nearly 137 kbp of the megaplasmid of *M. rhizoxinica* and  
498 involved several non-ribosomal peptide synthetases (NRPS), insecticidal toxin  
499 complex (Tc) proteins, and a high number of transposases among others. *M.*  
500 *rhizoxinica* harbors 15 NRPS genes clusters (56) in total, all of which are absent in  
501 *Vallotia*. NPRPs are large multienzyme machineries that assemble various peptides,  
502 which might function as antibiotics, signal molecules, or virulence factors (100).  
503 Insecticidal toxin complexes are bacterial protein toxins, which exhibit powerful  
504 insecticidal activity (101). Two of such proteins are also present in the large deleted  
505 chromosomal region in close proximity to the rhizoxin biosynthesis gene cluster  
506 (Figure 3B), however, their role in *M. rhizoxinica* remains elusive.

507 ***The Vallotia genome encodes for a subset of functions of the fungus***  
508 ***endosymbionts***

509 The number of protein coding genes of *Vallotia* is less than one-third of those  
510 of *M. rhizoxinica* and *M. endofungorum*, although metabolic functions are already  
511 reduced in the fungus endosymbionts compared to free-living *Burkholderia* (56).  
512 When compared to the two genomes of the fungus endosymbionts, only 53 proteins  
513 were specific to *Vallotia* (Figure S7). All of these were hypothetical proteins, and  
514 most of them showed no significant similarity to other proteins in public databases.

515 However, several fall within regions syntenic to the *M. rhizoxinica* genome and even  
516 retained partial sequence similarity to intact genes present solely in the fungus  
517 endosymbiont. Thus we assume that at least some of these *Vallotia* specific  
518 hypothetical proteins might rather be remnants of degrading genes and over-  
519 annotated/non-functional open reading frames than orphan genes with a yet unknown  
520 function (102,103). Four genes were present in *Vallotia* and *M. rhizoxinica* but were  
521 missing in *M. endofungorum*. These encoded for BioA, BioD in biotin biosynthesis,  
522 NagZ in cell wall recycling, and an MFS transporter. Fifteen genes, including for  
523 instance the MreB rod-shape determining protein, glycosyltransferase and hit family  
524 proteins, genes in lipopolysaccharide, lipoate synthesis, and the oxidative pentose  
525 phosphate pathway were shared between *Vallotia* and *M. endofungorum* only. The  
526 rest of the *Vallotia* genes, coding for 91% of all of its proteins, were shared among the  
527 fungus endosymbionts and the insect endosymbiont.

528 Comparing the genes present in both the insect and the fungus endosymbionts  
529 to those shared only by the fungus endosymbionts (Figure S8), we can infer selective  
530 functions maintained or lost during transition to insect endosymbiosis. Translation  
531 related functions have been retained in the greatest measure in the group shared by all  
532 endosymbionts. Functions, where higher proportion of genes were specific to the  
533 fungus endosymbioses, were related to transcription, inorganic ion transport and  
534 metabolism, secondary metabolite biosynthesis, signal transduction, intracellular  
535 trafficking, secretion, vesicular transport and defense mechanisms. (Most of the  
536 proteins specific to either of the fungus endosymbionts were homologous to  
537 transposases and integrases, transcriptional regulators, or had an unknown function.)

538 Fungus endosymbionts encode for a high number of transcriptional regulators  
539 (~5% of all genes in *M. rhizoxinica*) (56), but *Vallotia* has retained only a handful of  
540 such genes, which is a feature similar to other insect symbionts and might contribute  
541 to the overproduction of essential amino acids (62,104).

542 *M. rhizoxinica* is resistant against various  $\beta$ -lactams and has an arsenal of  
543 efflux pumps which might provide defense against antibacterial fungal molecules: the  
544 latter might also excrete virulence factors to the fungus cytosol (type I secretion) (56).  
545 Besides, *M. rhizoxinica* has several genes for pilus formation, adhesion proteins, and  
546 type II, type III, and type IV secretion systems which likely have a central role in host  
547 infection and manipulation in the bacteria-fungus symbiosis (56,105,106). However,  
548 all of the corresponding genes are missing in *Vallotia* thus neither of these  
549 mechanisms likely plays a role in the operation of the adelgid symbiosis. We could  
550 not even detect remnants of these genes in the *Vallotia* genome, except for a type II  
551 secretion system protein as a pseudogene. Loss of these functions is consistent with a  
552 strict vertical transmission of *Vallotia* between host generations, in contrast to *M.*  
553 *rhizoxinica*, which can spread also horizontally among fungi and can re-infect cured  
554 *Rhizopus* strains under laboratory conditions (86,87).

555 Additionally, the *M. rhizoxinica* genome encodes several predicted toxin-  
556 antitoxin systems (56). Plasmid-associated toxin-antitoxin systems can act as  
557 addiction molecules, which promote the maintenance of plasmids within bacterial  
558 populations (107). However, most of these are missing from *Vallotia*, only PasT, the  
559 toxic component of a chromosomal type II toxin-antitoxin system is present. Low  
560 levels of PasT can enhance bacterial stress resistance and growth of free-living



561 bacteria, while high concentrations can induce persister cell formation (108).

562 However, the function of PasT in *Vallotia* remains unclear.

563

## 564 **Conclusions**

565 In most plant-sap feeding insects harboring a dual symbiotic system, typically  
566 the more ancient symbiont provides most of the essential amino acids. However, due  
567 to the ongoing genomic degradation characteristic for endosymbionts even genes  
568 essential in the symbiosis can get inactivated (3,58). These events might lead to the  
569 acquisition and fixation of an additional, younger symbiont, which can complement  
570 these lost functions. For instance, among Auchenorrhyncha, the universal ancient  
571 symbiont *Sulcia* provides seven or eight essential amino acids, while the rest is  
572 supplied by different younger co-symbionts (109). As a consequence of a host-  
573 restricted lifestyle, the genome of the newly arriving symbiont will also lose many  
574 functions even among those key in the symbiosis but present in the other resident  
575 symbiont (64,67,109). Co-obligate symbionts of *A. laricis/tardus* are both  
576 evolutionary recent bacterial endosymbionts of adelgids with moderately reduced  
577 genomes. This is following their occurrence in larch (*Profftia* and *Vallotia*) and  
578 Douglas fir (*Vallotia*) associated lineages of adelgids, which likely diversified  
579 relatively recently, ~47 and ~60 million years ago from the remaining clades of  
580 adelgids, respectively (5). However, these recently gained adelgid symbionts show a  
581 high level of metabolic complementarity and low functional redundancy in essential  
582 amino acid synthesis. Given its presence in both larch and Douglas fir associated  
583 adelgids, *Vallotia* might be the relatively older symbiont, and it can synthesize nine

584 essential amino acids with a putative contribution of insect delivered compounds.  
585 Loss of functions in chorismate and anthranilate biosynthesis might have led to the  
586 fixation of *Profftia* in the system. *Profftia* can produce phenylalanine, but has lost its  
587 capabilities for synthesizing other essential amino acids. Host-derived compounds and  
588 partition of tryptophan biosynthesis between the co-symbionts in *A. laricis/tardus* are  
589 similar to other insect symbioses suggesting convergent evolution. However, the  
590 *Vallotia* - *Profftia* system differs from the *Annandia* - *Pseudomonas* system in *A.*  
591 *tsugae* where functions of the symbionts in essential amino acid synthesis are more  
592 balanced and redundant. It has been suggested that repeated replacement of symbionts  
593 among adelgids might be a consequence of periods with relaxed selection on  
594 symbiont functions due to different feeding behavior of adelgids on primary and  
595 secondary host trees – that is feeding on nutrient-rich parenchyma cells on spruce  
596 versus nutrient-poor phloem sap on alternate hosts – and multiple origins of host-  
597 alternating lifestyles (10). *Annandia*, the ancient symbiont of adelgids has lost many  
598 functions in essential amino acid biosynthesis, which could support this hypothesis  
599 (25), however the *Vallotia* - *Profftia* system does not follow this pattern.

600         One of the most remarkable findings of our study is the evolutionary link  
601 between the betaproteobacterial insect symbiont, *Vallotia*, and endosymbionts of  
602 *Rhizopus* fungi supported by their close phylogenetic relationships and a high-level of  
603 genomic synteny. There are many possible scenarios that could explain the origin of  
604 these symbioses. A common free-living ancestor could infect ancestral adelgids and  
605 *Rhizopus* fungi independently or developed an intracellular lifestyle in either of these  
606 hosts and got subsequently transmitted between them. We assume that a fungus-insect  
607 symbiont transition is more likely than multiple origins of these associations as the

608 proliferation of mobile genetic elements typical in early stages of host restriction  
609 would have resulted in extensive rearrangements and a substantially different genomic  
610 structure (94,110), as seen, for instance, between very closely related *Serratia*  
611 *symbiotica* strains in aphids (95). Alternative scenarios are also possible, but the  
612 phylogenetic position of *Vallotia* interleaved within the clade of *Rhizopus*  
613 endosymbionts and lack of functions specific to the adelgid symbiont point towards  
614 the putative origin of *Vallotia* from the fungus endosymbionts. The origin of insect  
615 symbionts from fungus endosymbionts is, according to our knowledge,  
616 unprecedented. *Rhizopus* endosymbionts are equipped with many functions for  
617 infection and overcoming host defense. Chitinase, chitosanase, and a putative chitin-  
618 binding protein have also been found among the putatively *Sec* exported proteins of  
619 *M. rhizoxinica* (56), which besides the infection of fungi could have had a role in the  
620 transmission into an insect host. In addition, *Rhizopus* endosymbionts could be  
621 maintained in pure cultures (86), thus, at least for a limited time, they might survive  
622 also outside of their hosts in the environment. Their host, *Rhizopus microsporus*, is a  
623 plant pathogen fungus with a broad environmental distribution. Thus a potential route  
624 for acquisition of the symbionts by insects could have been via plant tissues, the food  
625 source of adelgids, similar to plant-mediated symbiont transmission observed for  
626 intracellular insect symbionts (21).

627 Taken together, our genomic analysis of co-obligate endosymbionts of  
628 adelgids revealed a novel path for the evolution of bacteria-insect symbioses from a  
629 clade of fungus-associated ancestors.

630

631 **Acknowledgements**

632 We would like to acknowledge Alexander Siegl and Thomas Penz for their  
633 help in collecting adelgids and Irene Lichtscheidl-Schultz (Core Facility Cell Imaging  
634 and Ultrastructure Research, Cell Imaging Lab, University of Vienna) for the close-up  
635 photos of adelgids. This study was funded by the Austrian Science Fund (FWF)  
636 project P22533-B17. Work in the lab of M. H. is supported by Austrian Science Fund  
637 project DOC 69-B. A.M.M. was supported by a Marie Skłodowska-Curie Individual  
638 Fellowship (840270, LEECHSYMBIO) of the European Union.

639

640 **Competing Interests:** The authors declare no competing interests

641

## 642 **References**

- 643 1. Douglas AE. Phloem-sap feeding by animals: problems and solutions. *J Exp*  
644 *Bot* 2006; 57: 747–754.
- 645 2. Moran NA, McCutcheon JP, Nakabachi A. Genomics and Evolution of  
646 Heritable Bacterial Symbionts. *Annu Rev Genet* 2008; 42: 165–190.
- 647 3. Wernegreen JJ. Endosymbiont evolution: Predictions from theory and surprises  
648 from genomes. *Ann N Y Acad Sci* 2015; 1360: 16-35.
- 649 4. Havill NP, Foottit RG. Biology and evolution of adelgidae. *Annu Rev Entomol.*  
650 2007; 52: 325–349.
- 651 5. Havill NP, Foottit RG, von Dohlen CD. Evolution of host specialization in the  
652 Adelgidae (Insecta: Hemiptera) inferred from molecular phylogenetics. *Mol*  
653 *Phylogenet Evol* 2007; 44: 357–370.
- 654 6. Favret C, Havill NP, Miller GL, Sano M, Victor B. Catalog of the adelgids of  
655 the world (Hemiptera, Adelgidae). *ZooKeys* 2015; 534: 35–54.
- 656 7. Hrinkevich KH, Progar RA, Shaw DC. Climate Risk Modelling of Balsam  
657 Woolly Adelgid Damage Severity in Subalpine Fir Stands of Western North  
658 America. *PLOS ONE* 2016; 11: e0165094.
- 659 8. McClure MS, Cheah CAS-J. Reshaping the Ecology of Invading Populations of  
660 Hemlock Woolly Adelgid, *Adelges tsugae* (Homoptera: Adelgidae), in Eastern  
661 North America. *Biol Invasions* 1999; 1: 247–254.

- 662 9. von Dohlen CD, Spaulding U, Shields K, Havill NP, Rosa C, Hoover K.  
663 Diversity of proteobacterial endosymbionts in hemlock woolly adelgid  
664 (*Adelges tsugae*) (Hemiptera: Adelgidae) from its native and introduced range.  
665 *Environ Microbiol* 2013; 15: 2043-2062.
- 666 10. von Dohlen CD, Spaulding U, Patch KB, Weglarz KM, Footitt RG, Havill NP,  
667 et al. Dynamic Acquisition and Loss of Dual-Obligate Symbionts in the Plant-  
668 Sap-Feeding Adelgidae (Hemiptera: Sternorrhyncha: Aphidoidea). *Front*  
669 *Microbiol* 2017; 8: 1037-1052.
- 670 11. Michalik A, Gołas A, Kot M, Wieczorek K, Szklarzewicz T. Endosymbiotic  
671 microorganisms in *Adelges (Sacchiphantes) viridis* (Insecta, Hemiptera,  
672 Adelgoidea: Adelgidae): Molecular characterization, ultrastructure and  
673 transovarial transmission. *Arthropod Struct Dev* 2013; 42 : 531–538.
- 674 12. Toenshoff ER, Penz T, Narzt T, Collingro A, Schmitz-Esser S, Pfeiffer S, et al.  
675 Bacteriocyte-associated gammaproteobacterial symbionts of the *Adelges*  
676 *nordmannianae/piceae* complex (Hemiptera: Adelgidae). *ISME J* 2012; 6: 384–  
677 396.
- 678 13. Toenshoff ER, Gruber D, Horn M. Co-evolution and symbiont replacement  
679 shaped the symbiosis between adelgids (Hemiptera: Adelgidae) and their  
680 bacterial symbionts. *Environ Microbiol* 2012; 14: 1284–1295.
- 681 14. Toenshoff ER, Szabó G, Gruber D, Horn M. The Pine Bark Adelgid, *Pineus*  
682 *strobi*, Contains Two Novel Bacteriocyte-Associated Gammaproteobacterial  
683 Symbionts. *Appl Env Microbiol* 2014; 80: 878–885.

- 684 15. Gündüz EA, Douglas AE. Symbiotic bacteria enable insect to use a  
685 nutritionally inadequate diet. *Proc R Soc B Biol Sci* 2009; 276: 987–991.
- 686 16. Duron O, Hurst GD. Arthropods and inherited bacteria: from counting the  
687 symbionts to understanding how symbionts count. *BMC Biol* 2013; 11: 45–49.
- 688 17. Feldhaar H. Bacterial symbionts as mediators of ecologically important traits of  
689 insect hosts. *Ecol Entomol* 2011; 36: 533–543.
- 690 18. Oliver KM, Degnan PH, Burke GR, Moran NA. Facultative Symbionts in  
691 Aphids and the Horizontal Transfer of Ecologically Important Traits. *Annu Rev*  
692 *Entomol* 2010; 55: 247–266.
- 693 19. Moran NA, Dunbar HE. Sexual acquisition of beneficial symbionts in aphids.  
694 *Proc Natl Acad Sci* 2006; 103: 12803–12806.
- 695 20. Gehrer L, Vorburger C. Parasitoids as vectors of facultative bacterial  
696 endosymbionts in aphids. *Biol Lett* 2012; 8: 613–615.
- 697 21. Chrostek E, Pelz-Stelinski K, Hurst GDD, Hughes GL. Horizontal  
698 Transmission of Intracellular Insect Symbionts via Plants. *Front Microbiol*  
699 2017; 8: 2237–2245.
- 700 22. Manzano-Marín A, Coeur D’acier A, Clamens A-L, Orvain C, Cruaud C, Barbe  
701 V, et al. Serial horizontal transfer of vitamin-biosynthetic genes enables the  
702 establishment of new nutritional symbionts in aphids’ di-symbiotic systems.  
703 *ISME J* 2020; 14: 259–273.

- 704 23. Pons I, Renoz F, Noël C, Hance T. Circulation of the Cultivable Symbiont  
705 *Serratia symbiotica* in Aphids Is Mediated by Plants. *Front Microbiol* 2019; 10:  
706 764–777.
- 707 24. Clayton AL, Oakeson KF, Gutin M, Pontes A, Dunn DM, Niederhausern AC  
708 von, et al. A Novel Human-Infection-Derived Bacterium Provides Insights into  
709 the Evolutionary Origins of Mutualistic Insect–Bacterial Symbioses. *PLOS*  
710 *Genet* 2012; 8(11):e1002990.
- 711 25. Weglarz KM, Havill NP, Burke GR, von Dohlen CD. Partnering With a Pest:  
712 Genomes of Hemlock Woolly Adelgid Symbionts Reveal Atypical Nutritional  
713 Provisioning Patterns in Dual-Obligate Bacteria. *Genome Biol Evol* 2018; 10:  
714 1607–1621.
- 715 26. Zurovcova M, Havelka J, Stary P, Vechtova P, Chundelova D, Jarosova A, et  
716 al. “DNA barcoding” is of limited value for identifying adelgids (Hemiptera:  
717 Adelgidae) but supports traditional morphological taxonomy. *Eur J Entomol*  
718 2010; 107: 147–156.
- 719 27. Zhou J, Bruns MA, Tiedje JM. DNA recovery from soils of diverse  
720 composition. *Appl Environ Microbiol* 1996; 62: 316–322.
- 721 28. Schmieder R, Edwards R. Quality control and preprocessing of metagenomic  
722 datasets. *Bioinformatics* 2011; 27: 863–864.
- 723 29. Bankevich A, Nurk S, Antipov D, Gurevich AA, Dvorkin M, Kulikov AS, et al.  
724 SPAdes: A New Genome Assembly Algorithm and Its Applications to Single-  
725 Cell Sequencing. *J Comput Biol* 2012; 19: 455–477.



- 726 30. Li H, Durbin R. Fast and accurate short read alignment with Burrows–Wheeler  
727 transform. *Bioinformatics* 2009; 25: 1754–1760.
- 728 31. Camacho C, Coulouris G, Avagyan V, Ma N, Papadopoulos J, Bealer K, et al.  
729 BLAST+: architecture and applications. *BMC Bioinformatics* 2009; 10: 421–  
730 430.
- 731 32. Huson DH, Mitra S, Ruscheweyh H-J, Weber N, Schuster SC. Integrative  
732 analysis of environmental sequences using MEGAN4. *Genome Res* 2011; 21:  
733 1552–1560.
- 734 33. Lagesen K, Hallin P, Rødland EA, Stærfeldt H-H, Rognes T, Ussery DW.  
735 RNAmmer: consistent and rapid annotation of ribosomal RNA genes. *Nucleic  
736 Acids Res* 2007; 35: 3100–3108.
- 737 34. Weinmaier T, Platzer A, Frank J, Hellinger H-J, Tischler P, Rattei T. ConsPred:  
738 a rule-based (re-)annotation framework for prokaryotic genomes. *Bioinforma  
739 Oxf Engl* 2016; 32: 3327–3329.
- 740 35. Okonechnikov K, Golosova O, Fursov M, UGENE team. Unipro UGENE: a  
741 unified bioinformatics toolkit. *Bioinforma Oxf Engl* 2012; 28: 1166–1167.
- 742 36. Siguier P, Perochon J, Lestrade L, Mahillon J, Chandler M. ISfinder: the  
743 reference centre for bacterial insertion sequences. *Nucleic Acids Res* 2006;  
744 34(Database issue):D32-36.
- 745 37. Caspi R, Altman T, Dale JM, Dreher K, Fulcher CA, Gilham F, et al. The  
746 MetaCyc database of metabolic pathways and enzymes and the BioCyc

- 747 collection of pathway/genome databases. *Nucleic Acids Res* 2010; 38(Database  
748 issue):D473-479.
- 749 38. Karp PD, Paley SM, Krummenacker M, Latendresse M, Dale JM, Lee TJ, et al.  
750 Pathway Tools version 13.0: integrated software for pathway/genome  
751 informatics and systems biology. *Brief Bioinform* 2010; 11: 40–79.
- 752 39. Li L, Stoeckert CJ, Roos DS. OrthoMCL: identification of ortholog groups for  
753 eukaryotic genomes. *Genome Res* 2003; 13: 2178–2189.
- 754 40. Huerta-Cepas J, Forslund K, Coelho LP, Szklarczyk D, Jensen LJ, von Mering  
755 C, et al. Fast Genome-Wide Functional Annotation through Orthology  
756 Assignment by eggNOG-Mapper. *Mol Biol Evol* 2017; 34: 2115–2122.
- 757 41. Huerta-Cepas J, Szklarczyk D, Heller D, Hernández-Plaza A, Forslund SK,  
758 Cook H, et al. eggNOG 5.0: a hierarchical, functionally and phylogenetically  
759 annotated orthology resource based on 5090 organisms and 2502 viruses.  
760 *Nucleic Acids Res* 2019; 47(D1):D309–14.
- 761 42. Buchfink B, Xie C, Huson DH. Fast and sensitive protein alignment using  
762 DIAMOND. *Nat Methods* 2015; 12: 59–60.
- 763 43. Darling AE, Mau B, Perna NT. progressiveMauve: multiple genome alignment  
764 with gene gain, loss and rearrangement. *PloS One*. 2010; 5(6):e11147.
- 765 44. Krzywinski MI, Schein JE, Birol I, Connors J, Gascoyne R, Horsman D, et al.  
766 Circos: An information aesthetic for comparative genomics. *Genome Res* 2009;  
767 19:1639–1645.

- 768 45. Sullivan MJ, Petty NK, Beatson SA. Easyfig: a genome comparison visualizer.  
769 *Bioinformatics* 2011; 27: 1009–1010.
- 770 46. Wang Z, Wu M. A Phylum-Level Bacterial Phylogenetic Marker Database.  
771 *Mol Biol Evol* 2013; 30: 1258–1262.
- 772 47. Edgar RC. MUSCLE: multiple sequence alignment with high accuracy and  
773 high throughput. *Nucleic Acids Res* 2004; 32: 1792–1797.
- 774 48. Castresana J. Selection of Conserved Blocks from Multiple Alignments for  
775 Their Use in Phylogenetic Analysis. *Mol Biol Evol* 2000; 17: 540–552.
- 776 49. Kalyaanamoorthy S, Minh BQ, Wong TKF, von Haeseler A, Jermini LS.  
777 ModelFinder: fast model selection for accurate phylogenetic estimates. *Nat*  
778 *Methods* 2017; 14: 587–589.
- 779 50. Nguyen L-T, Schmidt HA, von Haeseler A, Minh BQ. IQ-TREE: A Fast and  
780 Effective Stochastic Algorithm for Estimating Maximum-Likelihood  
781 Phylogenies. *Mol Biol Evol* 2015; 32: 268–274.
- 782 51. Trifinopoulos J, Nguyen L-T, von Haeseler A, Minh BQ. W-IQ-TREE: a fast  
783 online phylogenetic tool for maximum likelihood analysis. *Nucleic Acids Res*  
784 2016; 44(W1):W232–235.
- 785 52. Minh BQ, Nguyen MAT, von Haeseler A. Ultrafast Approximation for  
786 Phylogenetic Bootstrap. *Mol Biol Evol* 2013; 30: 1188–1195.

- 787 53. Ronquist F, Teslenko M, Mark P van der, Ayres DL, Darling A, Höhna S, et al.  
788 MrBayes 3.2: Efficient Bayesian Phylogenetic Inference and Model Choice  
789 Across a Large Model Space. *Syst Biol.* 2012; 61: 539–542.
- 790 54. Miller MA, Pfeiffer W, Schwartz T. Creating the CIPRES Science Gateway for  
791 inference of large phylogenetic trees. In: 2010 Gateway Computing  
792 Environments Workshop (GCE). 2010. p. 1–8.
- 793 55. Dubarry N, Pasta F, Lane D. ParABS Systems of the Four Replicons of  
794 Burkholderia cenocepacia: New Chromosome Centromeres Confer Partition  
795 Specificity. *J Bacteriol* 2006; 188: 1489–1496.
- 796 56. Lackner G, Moebius N, Partida-Martinez LP, Boland S, Hertweck C. Evolution  
797 of an endofungal Lifestyle: Deductions from the Burkholderia rhizoxinica  
798 Genome. *BMC Genomics* 2011;12: 210–223.
- 799 57. Bright M, Bulgheresi S. A complex journey: transmission of microbial  
800 symbionts. *Nat Rev Microbiol* 2010 Mar; 8: 218–230.
- 801 58. Moran NA, Bennett GM. The tiniest tiny genomes. *Annu Rev Microbiol* 2014;  
802 68: 195–215.
- 803 59. Moran NA, Plague GR. Genomic changes following host restriction in bacteria.  
804 *Curr Opin Genet Dev* 2004;14: 627–633.
- 805 60. Wernegreen JJ. For better or worse: genomic consequences of intracellular  
806 mutualism and parasitism. *Curr Opin Genet Dev* 2005; 15: 572–583.

- 807 61. Kuo C-H, Ochman H. Deletional Bias across the Three Domains of Life.  
808 *Genome Biol Evol.* 2009; 1: 145–152.
- 809 62. McCutcheon JP, Moran NA. Extreme genome reduction in symbiotic bacteria.  
810 *Nat Rev Microbiol* 2012; 10: 13–26.
- 811 63. Lo W-S, Huang Y-Y, Kuo C-H. Winding paths to simplicity: genome evolution  
812 in facultative insect symbionts. *FEMS Microbiol Rev* 2016; 40: 855–874.
- 813 64. Lamelas A, Gosalbes MJ, Manzano-Marín A, Peretó J, Moya A, Latorre A.  
814 *Serratia symbiotica* from the Aphid *Cinara cedri*: A Missing Link from  
815 Facultative to Obligate Insect Endosymbiont. *PLoS Genet*  
816 2011;7(11):e1002357.
- 817 65. Manzano-Marín A, Latorre A. Snapshots of a shrinking partner: Genome  
818 reduction in *Serratia symbiotica*. *Sci Rep* 2016; 6: 1–11.
- 819 66. Koga R, Moran NA. Swapping symbionts in spittlebugs: evolutionary  
820 replacement of a reduced genome symbiont. *ISME J* 2014; 8: 1237–1246.
- 821 67. Bennett GM, McCutcheon JP, MacDonald BR, Romanovicz D, Moran NA.  
822 Differential Genome Evolution Between Companion Symbionts in an Insect-  
823 Bacterial Symbiosis. *mBio.* 2014; 5(5):e01697-14.
- 824 68. Husnik F, Nikoh N, Koga R, Ross L, Duncan RP, Fujie M, et al. Horizontal  
825 Gene Transfer from Diverse Bacteria to an Insect Genome Enables a Tripartite  
826 Nested Mealybug Symbiosis. *Cell* 2013; 153: 1567–1578.

- 827 69. Shigenobu S, Wilson ACC. Genomic revelations of a mutualism: the pea aphid  
828 and its obligate bacterial symbiont. *Cell Mol Life Sci* 2011; 68: 1297–309.
- 829 70. Kaplan E, Greene NP, Crow A, Koronakis V. Insights into bacterial lipoprotein  
830 trafficking from a structure of LolA bound to the LolC periplasmic domain.  
831 *Proc Natl Acad Sci U S A* 2018; 115: E7389–97.
- 832 71. Kruse T, Bork-Jensen J, Gerdes K. The morphogenetic MreBCD proteins of  
833 *Escherichia coli* form an essential membrane-bound complex. *Mol Microbiol*  
834 2005; 55: 78–89.
- 835 72. Tamaki S, Matsuzawa H, Matsushashi M. Cluster of *mrdA* and *mrdB* genes  
836 responsible for the rod shape and mecillinam sensitivity of *Escherichia coli*. *J*  
837 *Bacteriol* 1980; 141: 52–57.
- 838 73. Burke GR, Moran NA. Massive Genomic Decay in *Serratia symbiotica*, a  
839 Recently Evolved Symbiont of Aphids. *Genome Biol Evol* 2011; 3: 195–208.
- 840 74. Degnan PH, Leonardo TE, Cass BN, Hurwitz B, Stern D, Gibbs RA, et al.  
841 Dynamics of genome evolution in facultative symbionts of aphids. *Environ*  
842 *Microbiol* 2010; 12: 2060–2069.
- 843 75. Pabst MJ, Kuhn JC, Somerville RL. Feedback Regulation in the Anthranilate  
844 Aggregate from Wild Type and Mutant Strains of *Escherichia coli*. *J Biol Chem*  
845 1973; 248: 901–914.

- 846 76. Sloan DB, Moran NA. Genome Reduction and Co-evolution between the  
847 Primary and Secondary Bacterial Symbionts of Psyllids. *Mol Biol Evol* 2012;  
848 29: 3781–3792.
- 849 77. Hansen AK, Moran NA. Aphid genome expression reveals host–symbiont  
850 cooperation in the production of amino acids. *Proc Natl Acad Sci* 2011; 108:  
851 2849–2854.
- 852 78. Sloan DB, Nakabachi A, Richards S, Qu J, Murali SC, Gibbs RA, et al. Parallel  
853 histories of horizontal gene transfer facilitated extreme reduction of  
854 endosymbiont genomes in sap-feeding insects. *Mol Biol Evol* 2014; 31: 857–  
855 871.
- 856 79. Belitsky BR, Gustafsson MC, Sonenshein AL, Von Wachenfeldt C. An lrp-like  
857 gene of *Bacillus subtilis* involved in branched-chain amino acid transport. *J*  
858 *Bacteriol* 1997; 179:5448–5457.
- 859 80. Williams KP, Gillespie JJ, Sobral BWS, Nordberg EK, Snyder EE, Shallom  
860 JM, et al. Phylogeny of Gammaproteobacteria. *J Bacteriol* 2010; 192: 2305–  
861 2314.
- 862 81. Wu M, Eisen JA. A simple, fast, and accurate method of phylogenomic  
863 inference. *Genome Biol* 2008; 9: R151.
- 864 82. Adeolu M, Alnajjar S, Naushad S, S. Gupta R. Genome-based phylogeny and  
865 taxonomy of the ‘Enterobacteriales’: proposal for Enterobacterales ord. nov.  
866 divided into the families Enterobacteriaceae, Erwiniaceae fam. nov.,  
867 Pectobacteriaceae fam. nov., Yersiniaceae fam. nov., Hafniaceae fam. nov.,

- 868 Morganellaceae fam. nov., and Budviciaceae fam. nov. *Int J Syst Evol*  
869 *Microbiol* 2016; 66: 5575–5599.
- 870 83. Janda JM, Abbott SL. The Genus *Hafnia*: from Soup to Nuts. *Clin Microbiol*  
871 *Rev* 2006; 19: 12–28.
- 872 84. Lundgren JG, Lehman RM, Chee-sanford J. Bacterial Communities within  
873 Digestive Tracts of Ground Beetles (Coleoptera: Carabidae). *Ann Entomol Soc*  
874 *Am* 2007; 100: 275–282.
- 875 85. Estrada-de los Santos P, Palmer M, Chávez-Ramírez B, Beukes C, Steenkamp  
876 ET, Briscoe L, et al. Whole Genome Analyses Suggests that *Burkholderia*  
877 *sensu lato* Contains Two Additional Novel Genera (*Mycetohabitan*s gen. nov.,  
878 and *Trinickia* gen. nov.): Implications for the Evolution of Diazotrophy and  
879 Nodulation in the Burkholderiaceae. *Genes* 2018; 9: 389–412.
- 880 86. Partida-Martinez LP, Groth I, Schmitt I, Richter W, Roth M, Hertweck C.  
881 *Burkholderia rhizoxinica* sp. nov. and *Burkholderia endofungorum* sp. nov.,  
882 bacterial endosymbionts of the plant-pathogenic fungus *Rhizopus microsporus*.  
883 *Int J Syst Evol Microbiol* 2007; 57: 2583–2590.
- 884 87. Partida-Martinez LP, Hertweck C. Pathogenic fungus harbours endosymbiotic  
885 bacteria for toxin production. *Nature* 2005; 437: 884–888.
- 886 88. Partida-Martinez LP, Hertweck C. A Gene Cluster Encoding Rhizoxin  
887 Biosynthesis in “*Burkholderia rhizoxina*”, the Bacterial Endosymbiont of the  
888 Fungus *Rhizopus microsporus*. *ChemBioChem* 2007; 8: 41–45.



- 889 89. Moebius N, Üzüm Z, Dijksterhuis J, Lackner G, Hertweck C. Active invasion  
890 of bacteria into living fungal cells. *eLife* 2014; 3:e03007
- 891 90. Partida-Martinez LP, Monajembashi S, Greulich K-O, Hertweck C.  
892 Endosymbiont-Dependent Host Reproduction Maintains Bacterial-Fungal  
893 Mutualism. *Curr Biol* 2007; 17: 773–777.
- 894 91. Dolatabadi S, Walther G, Gerrits van den Ende AHG, de Hoog GS. Diversity  
895 and delimitation of *Rhizopus microsporus*. *Fungal Divers* 2014; 64: 145–163.
- 896 92. Lackner G, Hertweck C. Impact of Endofungal Bacteria on Infection Biology,  
897 Food Safety, and Drug Development. *PLOS Pathog* 2011; 7(6):e1002096.
- 898 93. Lackner G, Möbius N, Scherlach K, Partida-Martinez LP, Winkler R, Schmitt I,  
899 et al. Global Distribution and Evolution of a Toxinogenic *Burkholderia*-  
900 *Rhizopus* Symbiosis. *Appl Environ Microbiol* 2009; 75: 2982–2986.
- 901 94. Plague GR, Dunbar HE, Tran PL, Moran NA. Extensive Proliferation of  
902 Transposable Elements in Heritable Bacterial Symbionts. *J Bacteriol* 2008;  
903 190: 777–779.
- 904 95. Manzano-Marín A, Latorre A. Settling Down: The Genome of *Serratia*  
905 *symbiotica* from the Aphid *Cinara tujafilina* Zooms in on the Process of  
906 Accommodation to a Cooperative Intracellular Life. *Genome Biol Evol* 2014; 6:  
907 1683–1698.
- 908 96. Moran NA, Mira A. The process of genome shrinkage in the obligate symbiont  
909 *Buchnera aphidicola*. *Genome Biol* 2001; 2(12):research0054.1.

- 910 97. Moran NA. Tracing the evolution of gene loss in obligate bacterial symbionts.  
911 *Curr Opin Microbiol* 2003; 6: 512–518.
- 912 98. Silva FJ, Latorre A, Moya A. Genome size reduction through multiple events of  
913 gene disintegration in *Buchnera* APS. *Trends Genet* 2001; 17: 615–618.
- 914 99. Hamel E. Natural products which interact with tubulin in the vinca domain:  
915 Maytansine, rhizoxin, phomopsin a, dolastatins 10 and 15 and halichondrin B.  
916 *Pharmacol Ther* 1992; 55: 31–51.
- 917 100. Süßmuth RD, Mainz A. Nonribosomal Peptide Synthesis—Principles and  
918 Prospects. *Angew Chem Int Ed* 2017; 56: 3770–3821.
- 919 101. Landsberg MJ, Jones SA, Rothnagel R, Busby JN, Marshall SDG, Simpson  
920 RM, et al. 3D structure of the *Yersinia entomophaga* toxin complex and  
921 implications for insecticidal activity. *Proc Natl Acad Sci* 2011; 108: 20544–  
922 20549.
- 923 102. Ochman H. Distinguishing the ORFs from the ELFs: short bacterial genes and  
924 the annotation of genomes. *Trends Genet* 2002; 18: 335–337.
- 925 103. Satoshi F, Nishikawa K. Estimation of the Number of Authentic Orphan Genes  
926 in Bacterial Genomes. *DNA Res* 2004; 11: 219–231.
- 927 104. Moran NA, Dunbar HE, Wilcox JL. Regulation of Transcription in a Reduced  
928 Bacterial Genome: Nutrient-Provisioning Genes of the Obligate Symbiont  
929 *Buchnera aphidicola*. *J Bacteriol* 2005; 187: 4229–4237.

- 930 105. Lackner G, Moebius N, Hertweck C. Endofungal bacterium controls its host by  
931 an hrp type III secretion system. *ISME J* 2011; 5: 252–261.
- 932 106. Nivaskumar M, Francetic O. Type II secretion system: A magic beanstalk or a  
933 protein escalator. *Biochim Biophys Acta BBA - Mol Cell Res* 2014; 1843: 1568–  
934 1577.
- 935 107. Van Melderen L. Toxin–antitoxin systems: why so many, what for? *Curr Opin*  
936 *Microbiol* 2010; 13: 781–785.
- 937 108. Norton JP, Mulvey MA. Toxin-Antitoxin Systems Are Important for Niche-  
938 Specific Colonization and Stress Resistance of Uropathogenic *Escherichia coli*.  
939 *PLOS Pathog* 2012; 8(10):e1002954.
- 940 109. McCutcheon JP, Moran NA. Functional Convergence in Reduced Genomes of  
941 Bacterial Symbionts Spanning 200 My of Evolution. *Genome Biol Evol* 2010;  
942 2: 708–718.
- 943 110. Bordenstein SR, Reznikoff WS. Mobile DNA in obligate intracellular bacteria.  
944 *Nat Rev Microbiol* 2005; 3: 688–699.
- 945

946

947 **Figure Legends**

948 **Figure 1. Division of labor in amino acid biosynthesis and transport between**  
949 ***Vallotia* and *Profftia* showing co-obligatory status of endosymbionts of *A.***  
950 ***laricis/tardus*.** Amino acids produced by *Vallotia* and *Profftia* are shown in blue and  
951 red, respectively. Bolded texts indicate essential amino acids. The insect host likely  
952 supplies ornithine, homocysteine, 2-oxobutanoate and glutamine. Other compounds  
953 that cannot be synthesized by the symbionts are shown in grey italics.

954

955 **Figure 2. Phylogenomic analysis showing the affiliation of the adelgid**  
956 **endosymbiont ‘*Candidatus Vallotia tarda*’ and its closest relatives, the fungus**  
957 **endosymbionts *M. rhizoxinica* and *M. endofungorum* within the**  
958 ***Burkholderiaceae*.** Free-living and pathogenic bacteria are colored in purple. Selected  
959 members of *Oxalobacteraceae* (*Janthinobacterium agaricidamnorum* [HG322949],  
960 *Collimonas pratensis* [CP013234] and *Herbaspirillum seropedicae* [CP011930]) were  
961 used as outgroup. Maximum likelihood (IQ-TREE) and Bayesian analyses (MrBayes)  
962 were performed based on a concatenated alignment of 108 proteins. Maximum  
963 likelihood tree is shown. SH-aLRT support (%) and ultrafast bootstrap support (%)  
964 values based on 1000 replicates, and Bayesian posterior probabilities are indicated on  
965 the internal nodes. Asterisks stand for a maximal support in each analysis (100% / 1).

966

967 **Figure 3. (A) Synteny between the chromosome and plasmid of *Vallotia* and *M.***  
968 ***rhizoxinica*, an endosymbiont of *Rhizopus* fungi.** The outermost and the middle

969 rings show genes in forward and reverse strand orientation, respectively. These  
970 include rRNA genes in red and tRNA genes in dark orange. The innermost ring  
971 indicates single-copy genes shared by *M. rhizoxinica* and *Vallotia* in black. Purple and  
972 dark yellow lines connect forward and reverse matches between the genomes,  
973 respectively. The two small contigs involving the rRNA genes of *Vallotia* are not  
974 shown. **(B) Close-up of the largest deletion on the chromosome of *M. rhizoxinica***  
975 **and the syntenic region on the *Vallotia* chromosome.** Genes are colored according  
976 to COG categories. Yellow: secondary metabolite biosynthesis; red: transposase;  
977 grey: unknown function; khaki: replication, recombination and repair; pink: lipid  
978 transport and metabolism; brown: protein turnover and chaperones; dark green: amino  
979 acid transport and metabolism; light green: cell envelope biogenesis; black:  
980 transcription.  
981

| <b>Feature</b>     | <b><i>Profftia</i></b> | <b><i>Vallotia</i></b> |                |
|--------------------|------------------------|------------------------|----------------|
|                    | <b>Chromosome</b>      | <b>Chromosome</b>      | <b>Plasmid</b> |
| Genome size (bp)   | 1,225,795              | 1,110,884              | 72,431         |
| GC (%)             | 31.9                   | 42.8                   | 36.1           |
| Coding density (%) | 52.4                   | 65.6                   | 46.2           |
| CDS                | 645                    | 751                    | 29             |
| rRNA genes         | 3                      | 3*                     | 0              |
| tRNAs              | 35                     | 37                     | 0              |
| Pseudogenes        | 21                     | 47                     | 5              |

982

983

984 **Table 1.** Genomic features of *Profftia* and *Vallotia*. \**Vallotia* likely has three copies

985 of each rRNA gene based on the sequence coverage of the corresponding contigs

986 involving these genes.

987

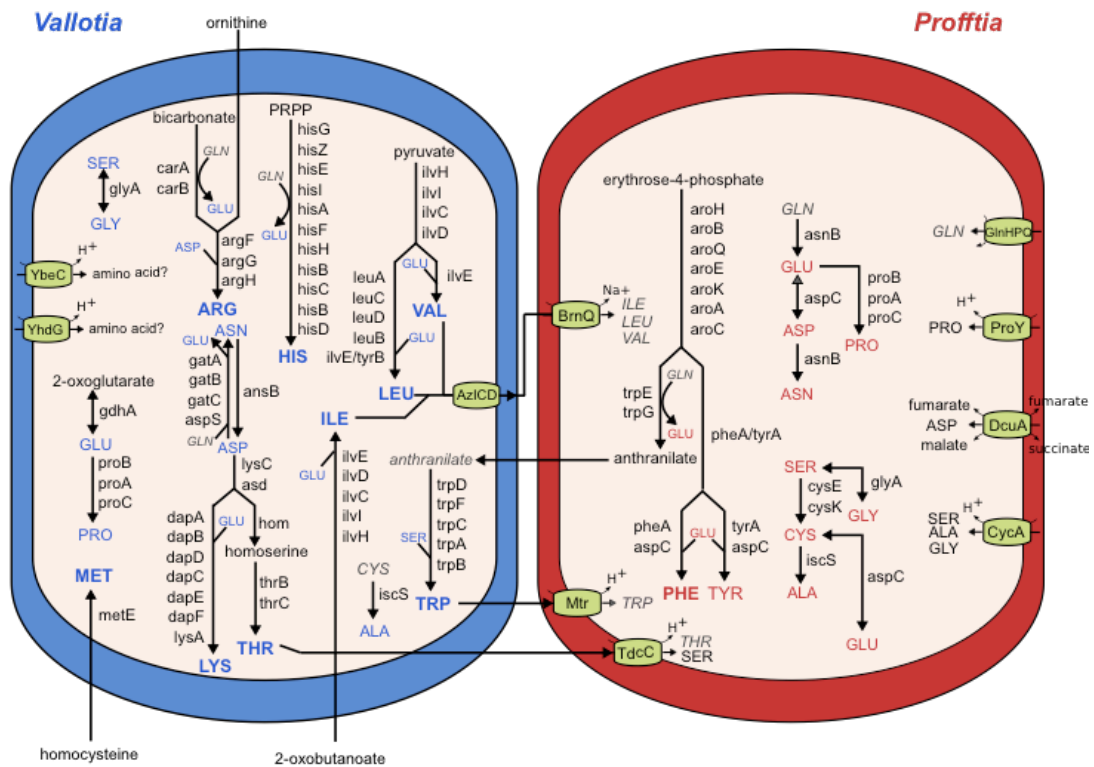

988

989 **Figure 1. Division of labor in amino acid biosynthesis and transport between**  
 990 ***Vallotia* and *Profftia* showing co-obligatory status of endosymbionts of *A.***  
 991 ***laricis/tardus*.** Amino acids produced by *Vallotia* and *Profftia* are shown in blue and  
 992 red, respectively. Bolded texts indicate essential amino acids. The insect host likely  
 993 supplies ornithine, homocysteine, 2-oxobutanoate and glutamine. Other compounds  
 994 that cannot be synthesized by the symbionts are shown in grey italics.

995

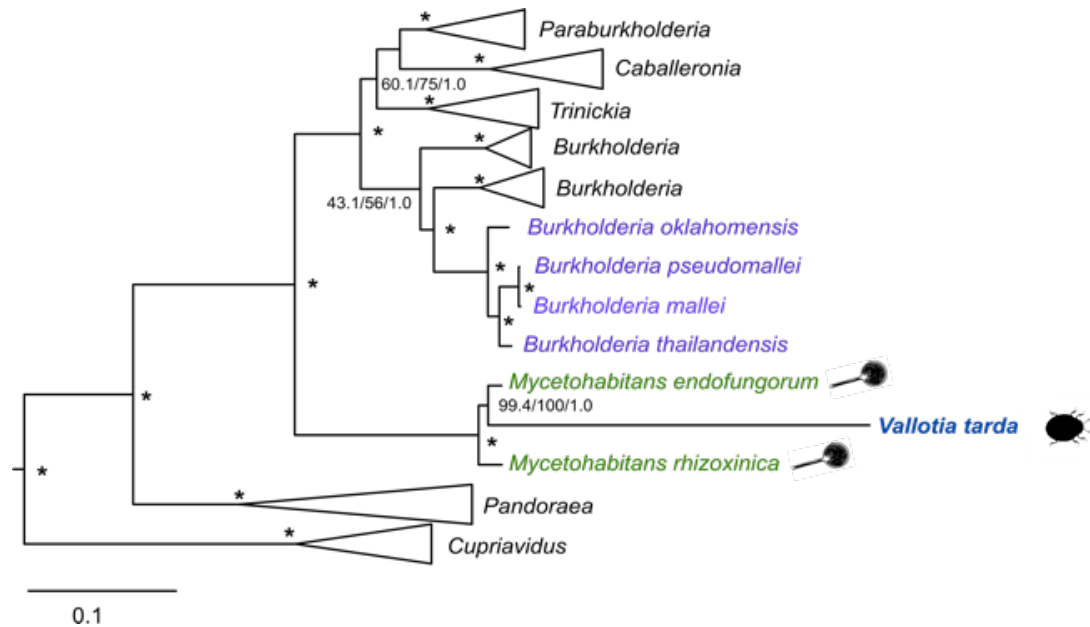

996

0.1

997 **Figure 2. Phylogenomic analysis showing the affiliation of the adelgid**  
998 **endosymbiont ‘Candidatus Vallotia tarda’ and its closest relatives, the fungus**  
999 **endosymbionts *M. rhizoxinica* and *M. endofungorum* within the**  
1000 ***Burkholderiaceae*. Free-living and pathogenic bacteria are colored in purple. Selected**  
1001 **members of *Oxalobacteraceae* (*Janthinobacterium agaricidamnosum* [HG322949],**  
1002 ***Collimonas pratensis* [CP013234] and *Herbaspirillum seropedicae* [CP011930]) were**  
1003 **used as outgroup. Maximum likelihood (IQ-TREE) and Bayesian analyses (MrBayes)**  
1004 **were performed based on a concatenated alignment of 108 proteins. Maximum**  
1005 **likelihood tree is shown. SH-aLRT support (%) and ultrafast bootstrap support (%)**  
1006 **values based on 1000 replicates, and Bayesian posterior probabilities are indicated on**  
1007 **the internal nodes. Asterisks stand for a maximal support in each analysis (100% / 1).**  
1008



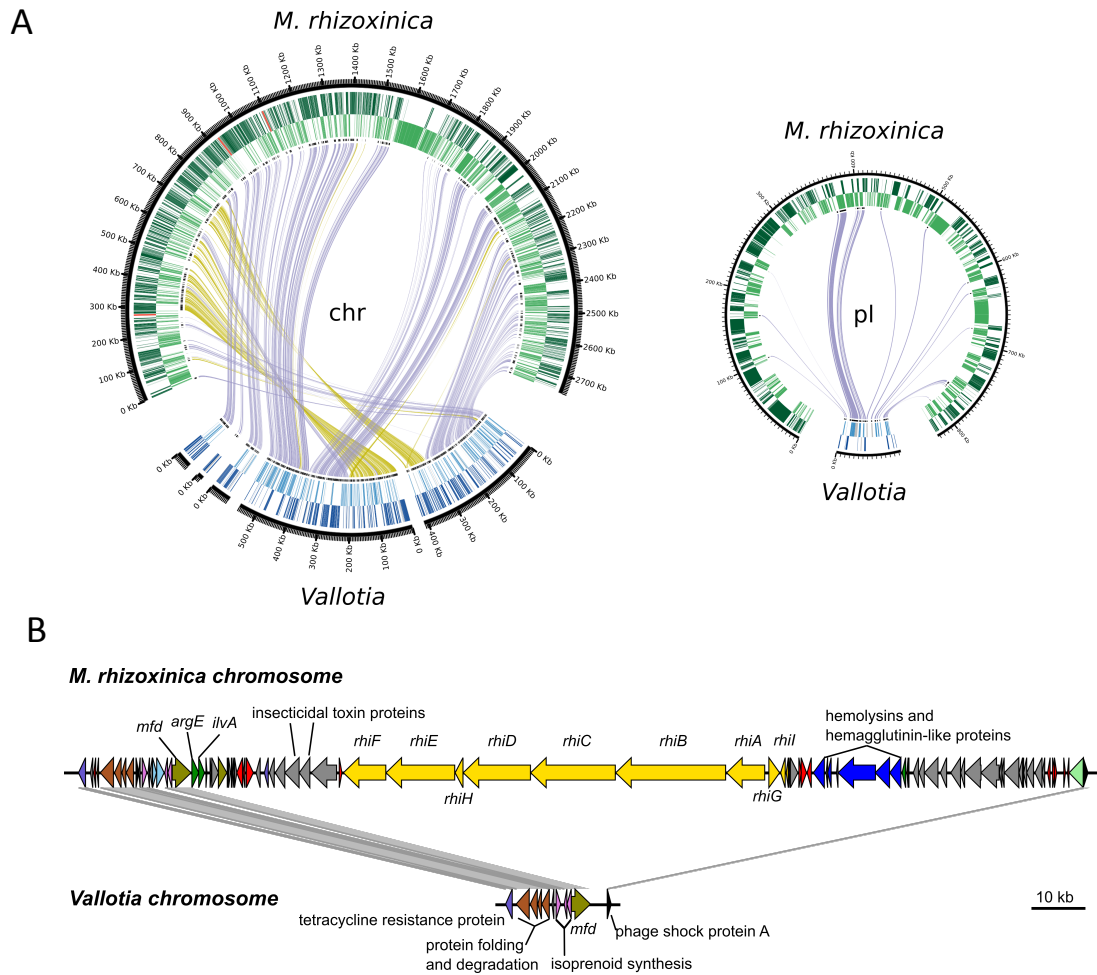

1009

1010 **Figure 3. (A) Synteny between the chromosome and plasmid of *Vallotia* and *M.***  
 1011 ***rhizoxinica*, an endosymbiont of *Rhizopus* fungi.** The outermost and the middle  
 1012 rings show genes in forward and reverse strand orientation, respectively. These  
 1013 include rRNA genes in red and tRNA genes in dark orange. The innermost ring  
 1014 indicates single-copy genes shared by *M. rhizoxinica* and *Vallotia* in black. Purple and  
 1015 dark yellow lines connect forward and reverse matches between the genomes,  
 1016 respectively. The two small contigs involving the rRNA genes of *Vallotia* are not  
 1017 shown. **(B) Close-up of the largest deletion on the chromosome of *M. rhizoxinica***  
 1018 **and the syntenic region on the *Vallotia* chromosome.** Genes are colored according  
 1019 to COG categories. Yellow: secondary metabolite biosynthesis; red: transposase;  
 1020 grey: unknown function; khaki: replication, recombination and repair; pink: lipid  
 1021 transport and metabolism; brown: protein turnover and chaperones; dark green: amino  
 1022 acid transport and metabolism; light green: cell envelope biogenesis; black:  
 1023 transcription.
