# Supplementary material for: Evolutionary recent dual obligatory symbiosis among adelgids indicates a transition between fungus and insect associated lifestyles
Source: bioRxiv or medRxiv preprint supplement (doi:10.1101/2020.10.16.342642), 2020-10-16
Supplement: Supplementary file [file media-1.pdf]

**Evolutionary recent dual obligatory symbiosis among adelgids indicates a transition between fungus and insect associated lifestyles**

Gitta Szabó, Frederik Schulz, Alejandro Manzano-Marín,  
Elena Rebecca Toenshoff, Matthias Horn

Supplementary Information

## **B vitamin synthesis by *Vallotia***

*Vallotia* likely produces six B vitamins. For the synthesis of riboflavin, neither *yigB* nor *ybjI* (Haase et al., 2013) were found, however, the promiscuity of phosphatases has been documented (Kuznetsova et al., 2006). Thus another phosphatase, such as VALLOT\_G\_01570 and VALLOT\_G\_02690 both belonging to the Haloacid dehalogenase-like hydrolase superfamily, like YigB, might perform this reaction. As is the case for other endosymbionts, *panD* is missing for the *de novo* synthesis of pantothenate, thus this would occur from L-valine and  $\beta$ -alanine in *Vallotia*. Regarding pyridoxine, *Vallotia* lacks *pdxB* and *serC*, but alternatives such as the ‘serendipitous pathways’, *thiG* and an unspecific transaminase might bypass these steps (Kim et al., 2019; Oberhardt et al., 2016). *BioH* and *bioF* in biotin synthesis are missing from both symbionts, nonetheless, these are also notably absent in several symbiotic systems of aphids (Manzano-Marín et al., 2018; Manzano-Marín et al., 2020). *Vallotia* might still produce biotin, if either 8-amino-7-oxononanoate (KAPA) is imported or if these steps are taken over by the host. Finally, given their lack of *nadB* and *nadC* genes, both endosymbionts could synthesize NAD<sup>+</sup> and NADP<sup>+</sup> from the import of nicotinate.

**'*Candidatus Mycetohabitans vallotii*' sp. nov.**

Based on the well supported phylogenetic positioning of '*Candidatus Vallotia tarda*' within the clade formed by both currently recognized *Mycetohabitans* species, we propose the transfer of '*Candidatus Vallotia tarda*' (NCBI taxonomy ID 1177213) to the *Mycetohabitans* genus. To keep the naming consistent, we propose the specific name '*Candidatus Mycetohabitans vallotii*' (va.lo.tii) in honor of the researcher Vallot, who described *A. laricis* in 1836. '*Candidatus Mycetohabitans vallotii*' strains have a rod-shaped cell and co-inhabit the cytoplasm of bacteriocytes of *A. laricis/tardus* along with '*Candidatus Profftia tarda*' (Toenshoff et al., 2012). We propose the old species-specific name be used as a strain name, as '*Candidatus Mycetohabitans vallotii*' strain *tarda*. Given their monophyletic origin, the transfer of other species of the '*Candidatus Vallotia*' genus to the *Mycetohabitans* genus is reasonable (von Dohlen et al., 2017; Toenshoff et al., 2012), however as multilocus sequence data are not available for those endosymbionts yet, we leave their species level re-designation open for future studies.

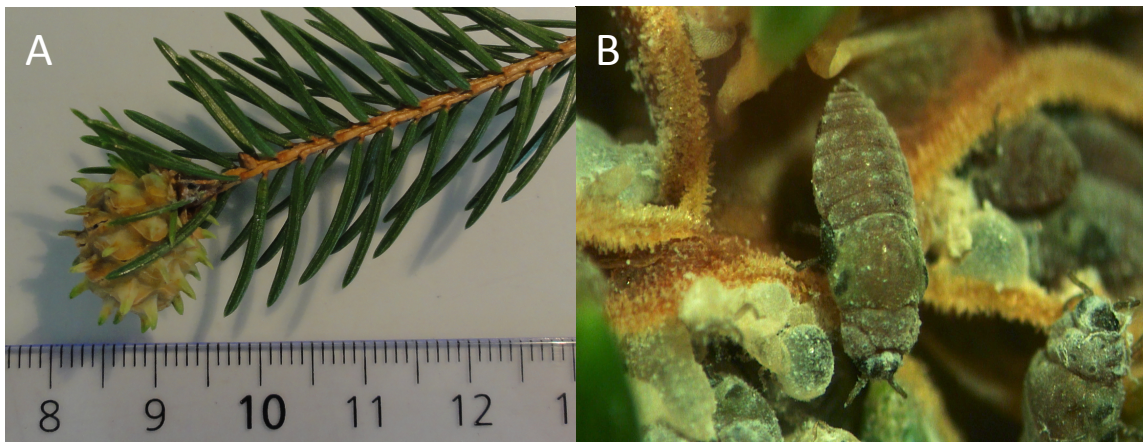

**Figure S1.** (A) A gall of *Adelges laricis/tardus* collected with a spruce branch. (B) Adelgids in an opened gall.



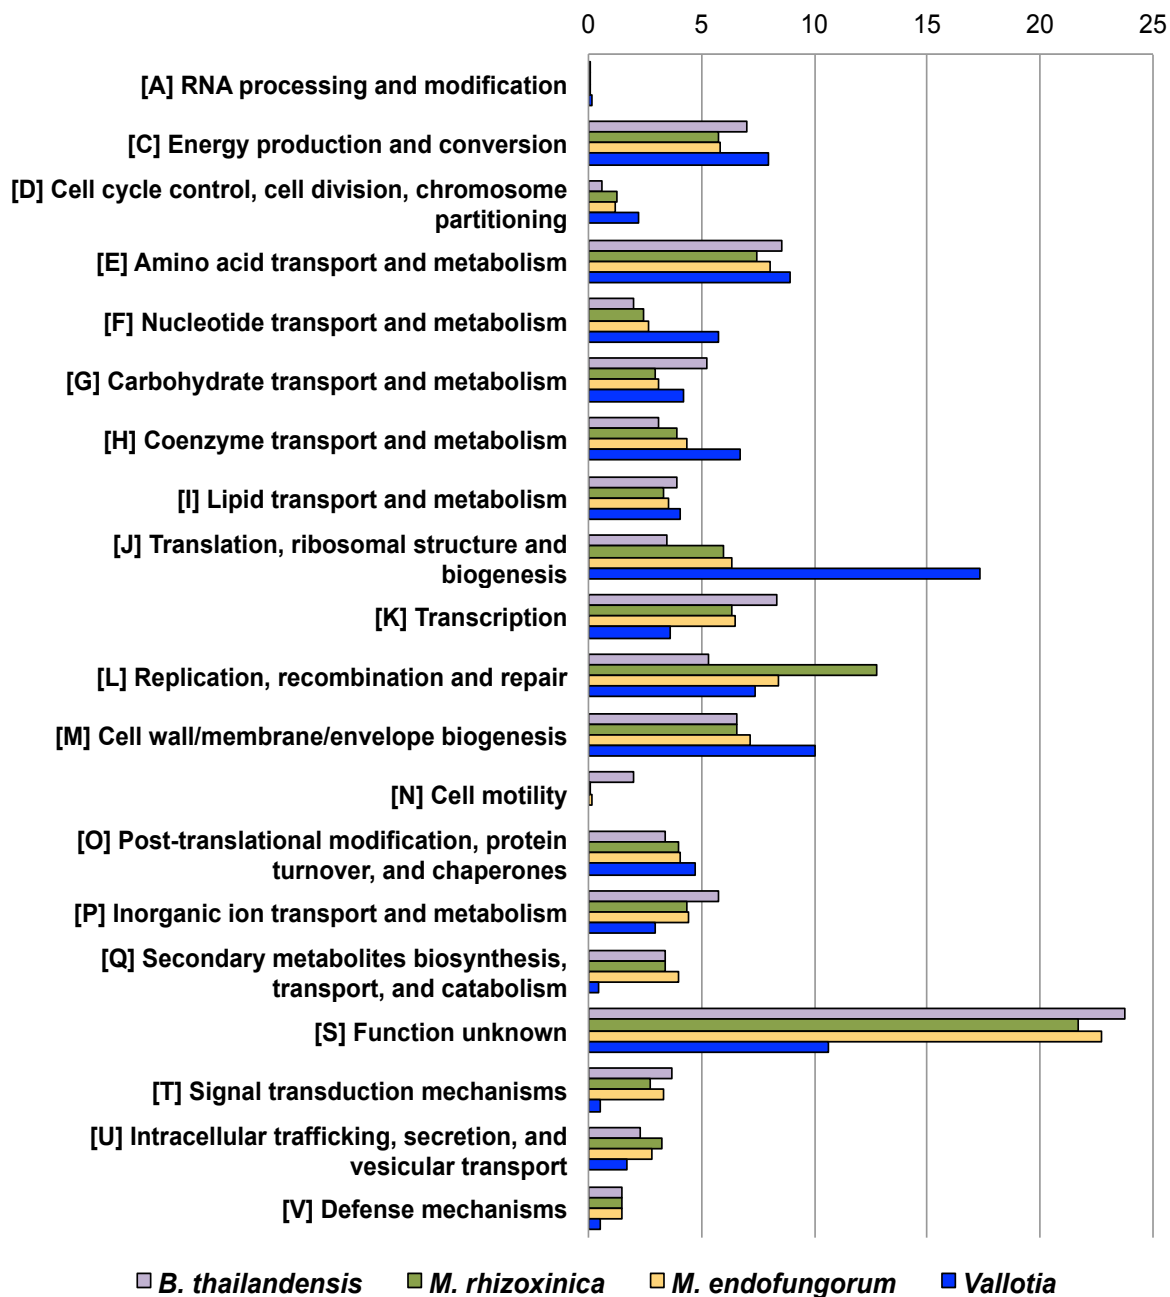

**Figure S2.** Functional reduction in *Vallotia*. Proportion (%) of genes among main functional categories according to the EggNOG classification in the genomes of *Vallotia*, related fungus endosymbionts, *Mycetohabitans rhizoxinica* [FR687359.1, FR687360.1, FR687361.1] and *M. endofungorum* [GCA\_002927045.1], and a free-living bacteria, *Brukholderia thailandensis* [CP008785.1].

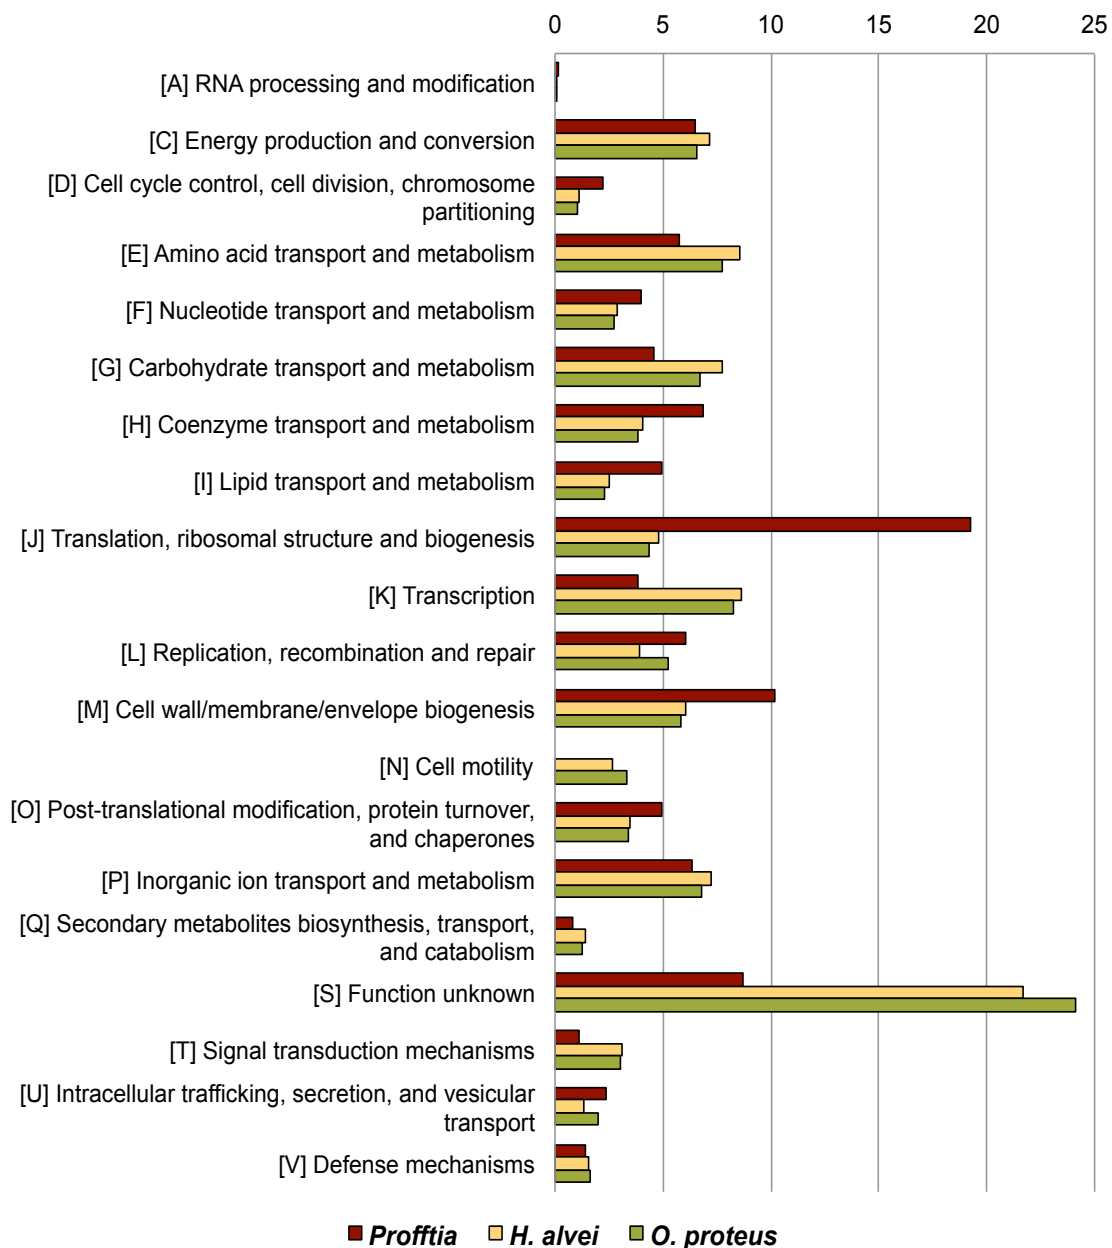

**Figure S3.** Proportion (%) of genes among main functional categories according to the EggNOG classification in the genomes of *Profftia* and related free-living bacteria, *Hafnia alvei* [CP036514.1] and *Obesumbacterium proteus* [CP014608.1].

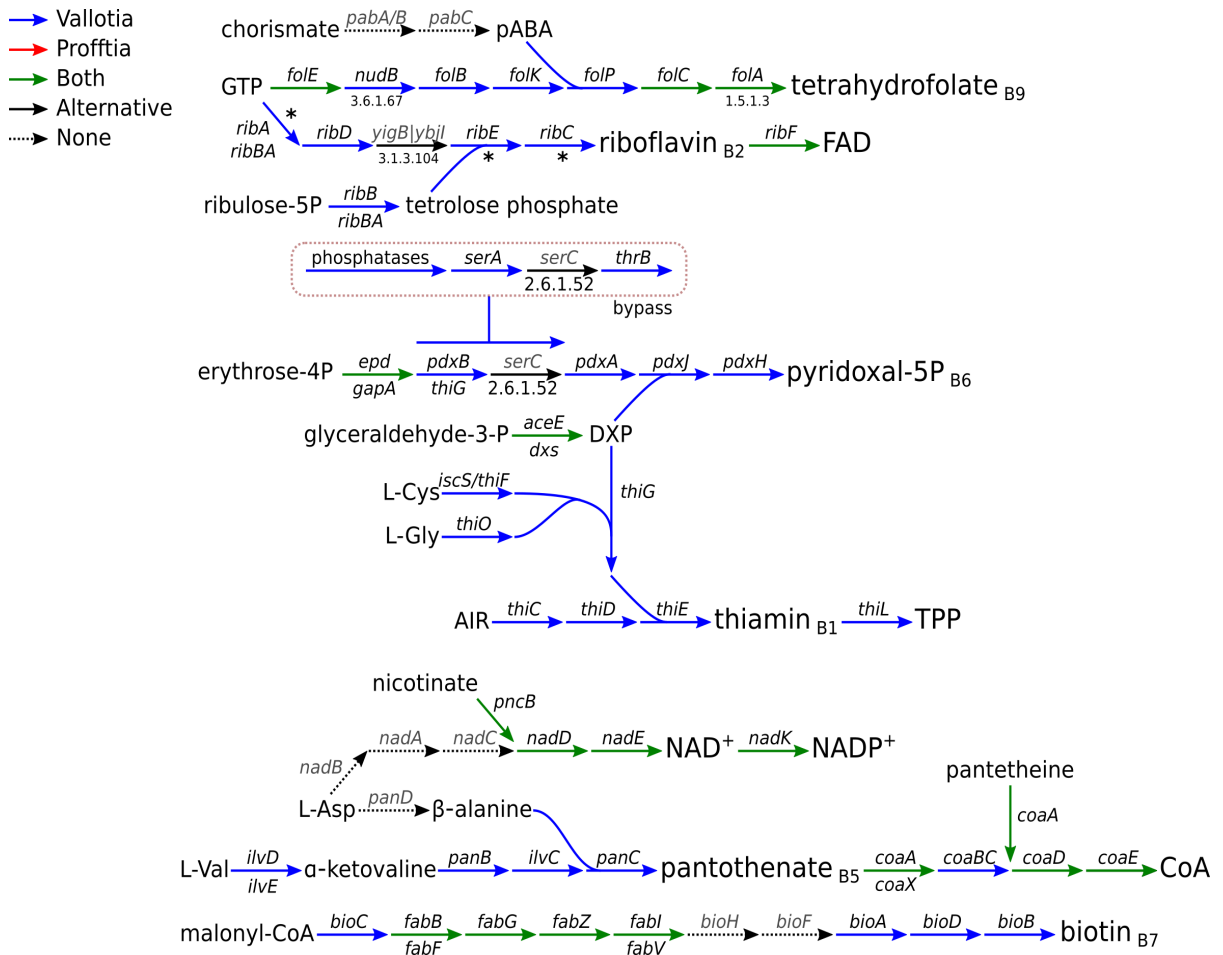

**Figure S4.** B vitamin synthesis as inferred based on the presence of genes in *Vallotia* and *Profftia*. Missing genes are shown in grey. Asterisks indicate pseudogenes of *Profftia*.

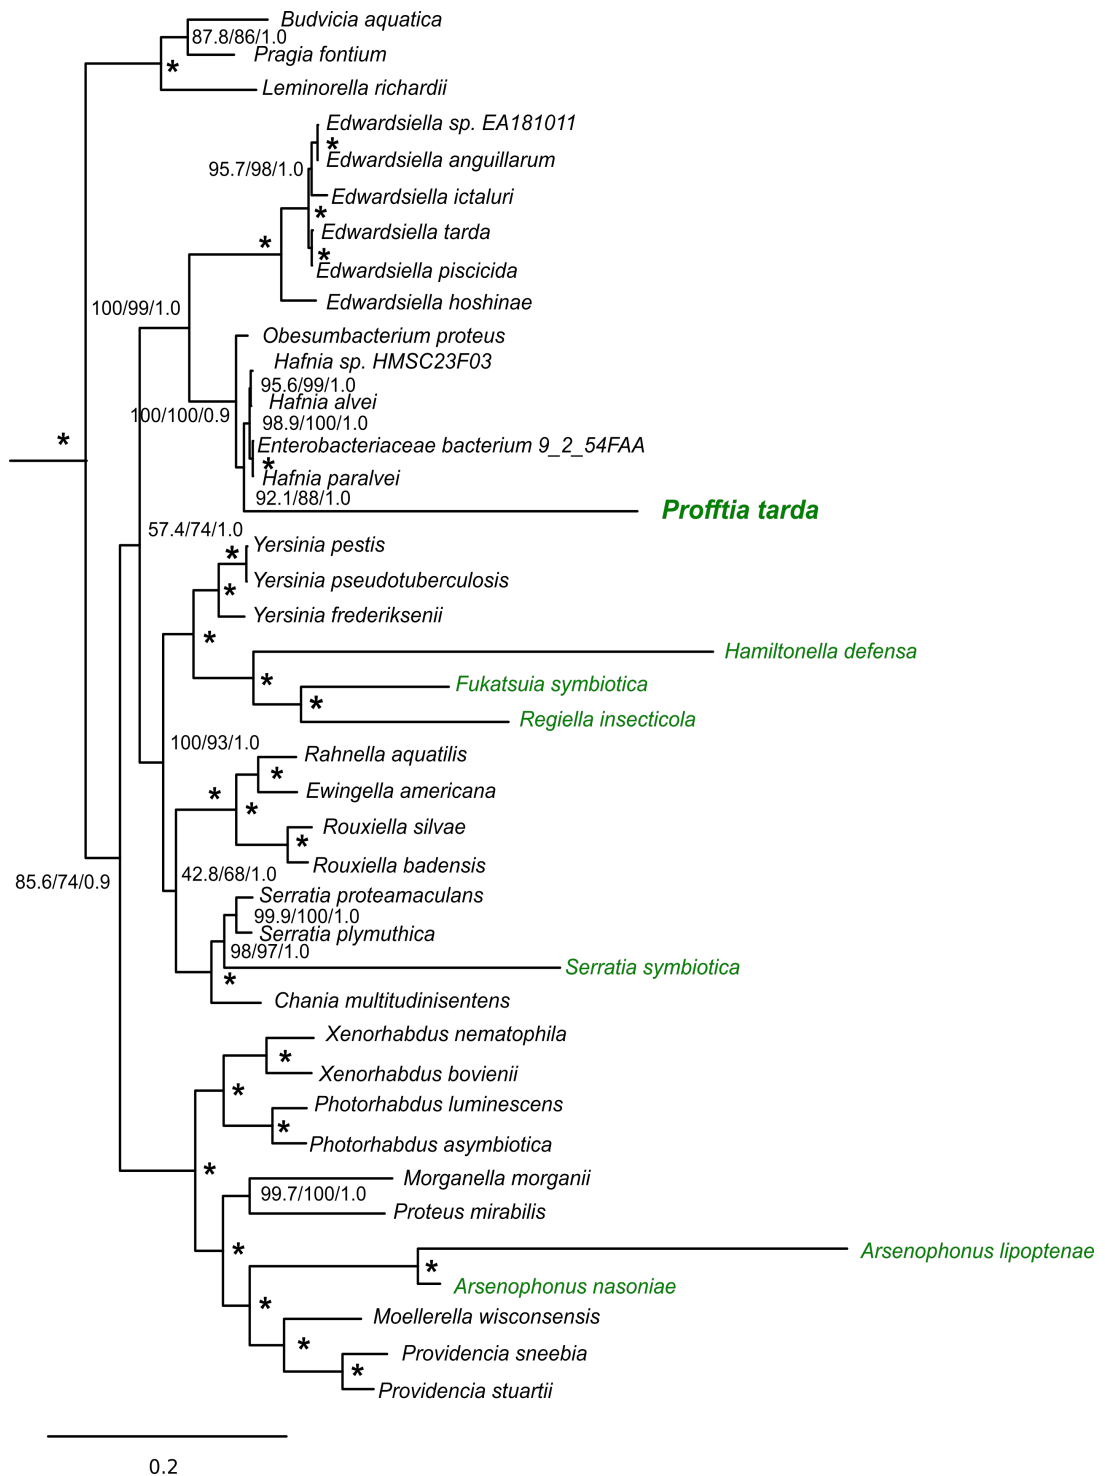

**Figure S5.** Phylogenomic analysis showing the affiliation of ‘*Candidatus Profftia tarda*’ within the Enterobacteriales. Insect symbionts are highlighted in green. *Xanthomonas campestris* [AE008922], *Stenotrophomonas maltophilia* [AM743169] and *Pseudomonas aeruginosa* [AE004091]) were used as outgroups. Maximum likelihood (IQTREE) and Bayesian trees (MrBayes) were based on a concatenated set of 45 proteins. Maximum likelihood tree is shown. SH-aLRT support (%) and ultrafast bootstrap support (%) values based on 1000 replicates, and Bayesian posterior probabilities are indicated on the internal nodes. Asterisks stand for a maximal support in each analysis (100% / 1). The branch length leading to *Profftia* indicated accelerated evolutionary rates and was similar to those of other obligate and facultative insect symbionts included in the analysis.

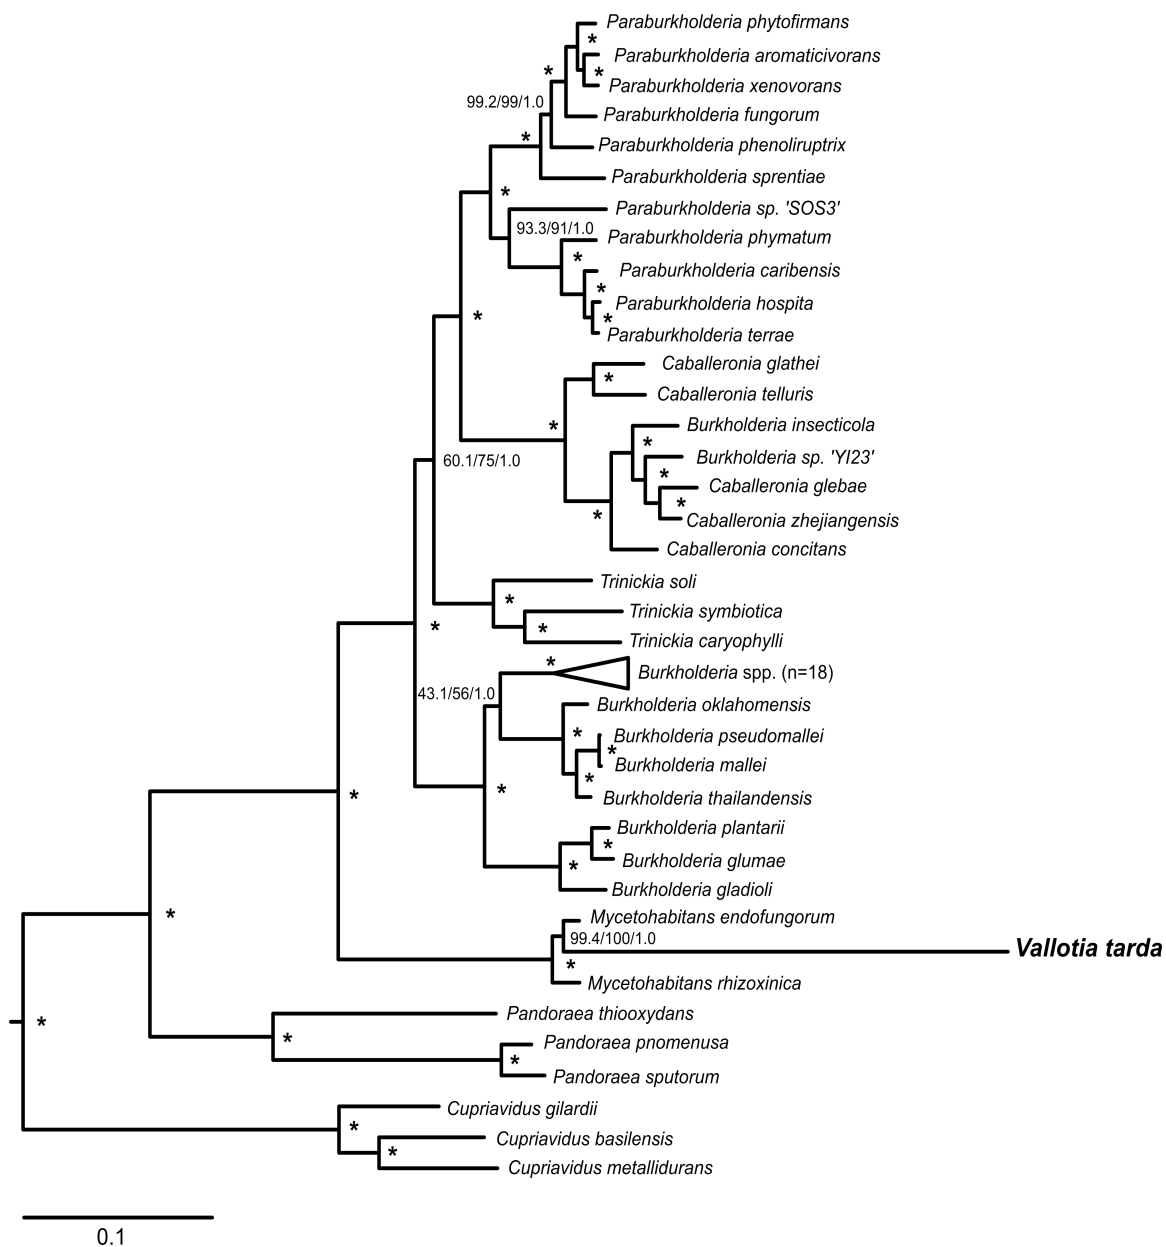

**Figure S6.** Phylogenomic analysis showing the affiliation of ‘*Candidatus Vallotia tarda*’ within the *Burkholderiaceae*. Selected members of *Oxalobacteraceae* (*Janthinobacterium agaricidamnorum* [HG322949], *Collimonas pratensis* [CP013234] and *Herbaspirillum seropedicae* [CP011930]) were used as outgroups. Maximum likelihood (IQTREE) and Bayesian analyses (MrBayes) were performed based on a concatenated set of 108 proteins. Maximum likelihood tree is shown. SH-aLRT support (%) and ultrafast bootstrap support (%) values based on 1000 replicates, and Bayesian posterior probabilities are indicated on the internal nodes. Asterisks stand for a maximal support in each analysis (100% / 1).

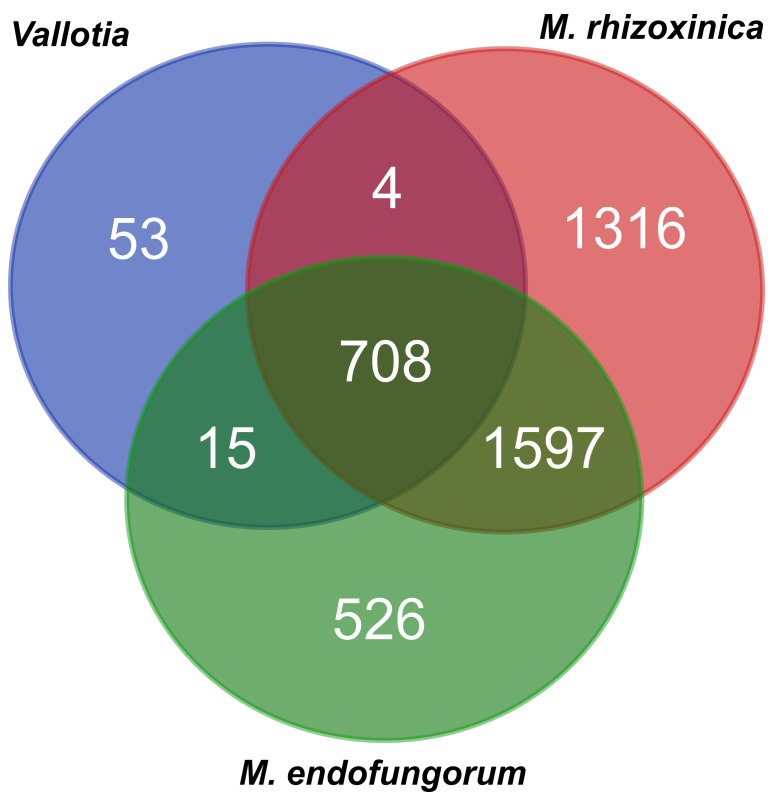

**Figure S7.** Venn diagram showing the pan-genome of the insect endosymbiont, *Vallotia*, and related fungus endosymbionts, *M. rhizoxinica* [FR687359.1, FR687360.1, FR687361.1] and *M. endofungorum* [GCA\_002927045.1].

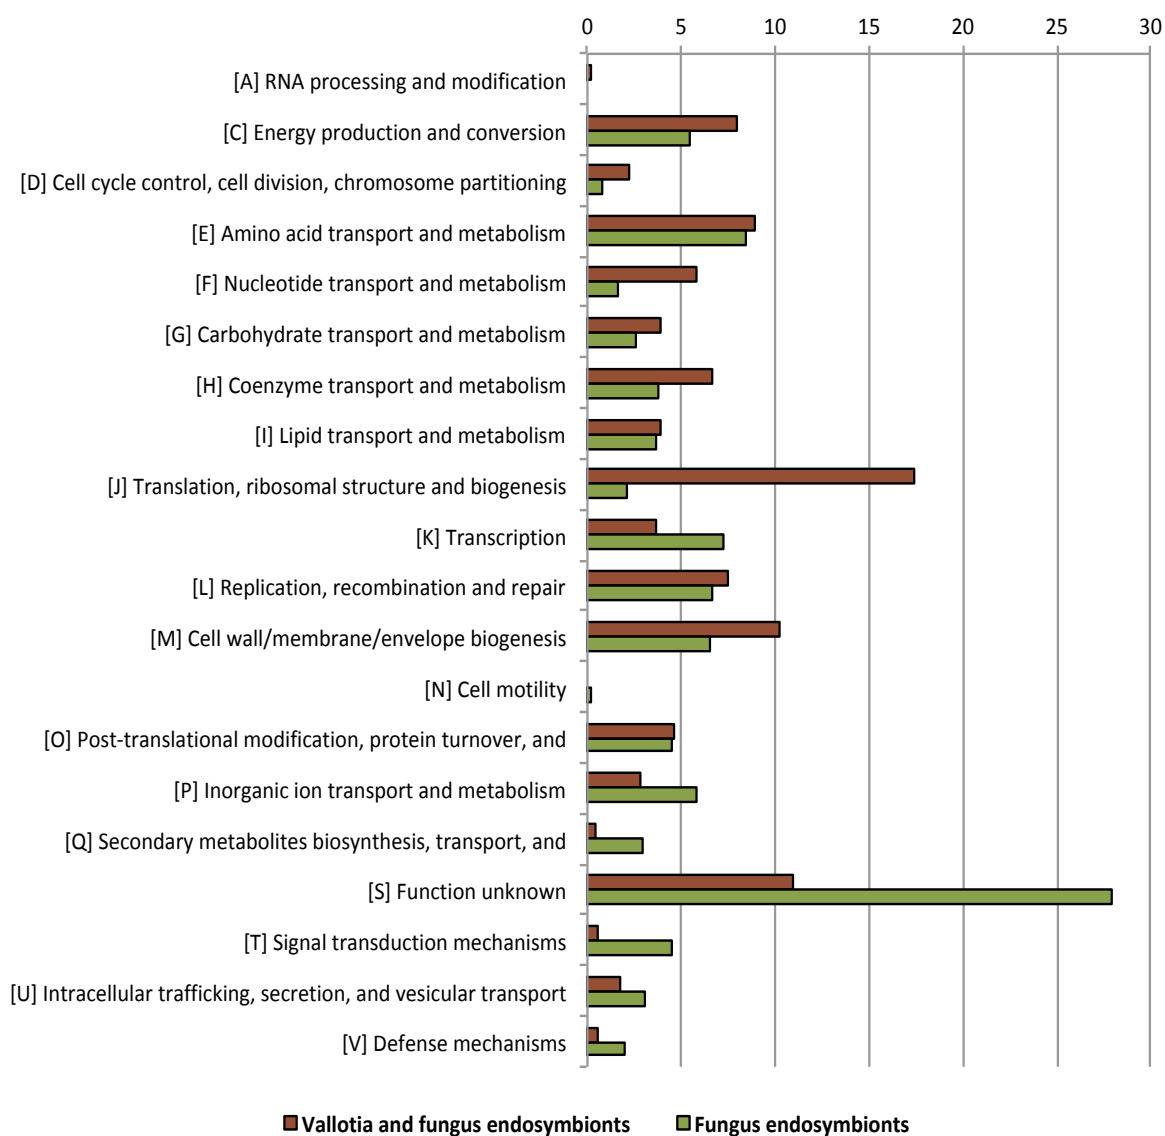

**Figure S8.** Proportion (%) of genes shared by *Vallotia* and fungus endosymbionts (shown in brown) compared to those shared only by the fungus endosymbionts (shown in green) – *M. rhizoxinica* [FR687359.1, FR687360.1, FR687361.1] and *M. endofungorum* [GCA\_002927045.1] – among the main functional categories according to the EggNOG classification.

### Supplementary references

Haase, I., Sarge, S., Illarionov, B., Laudert, D., Hohmann, H.-P., Bacher, A., and Fischer, M. (2013) Enzymes from the Haloacid Dehalogenase (HAD) superfamily catalyse the elusive dephosphorylation step of riboflavin biosynthesis. *ChemBioChem* 14: 2272–2275.

Kim, J., Flood, J.J., Kristofich, M.R., Gidfar, C., Morgenthaler, A.B., Fuhrer, T., et al. (2019) Hidden resources in the *Escherichia coli* genome restore PLP synthesis and robust growth after deletion of the essential gene *pdxB*. *Proc Natl Acad Sci* 116: 24164–24173.

Kuznetsova, E., Proudfoot, M., Gonzalez, C.F., Brown, G., Omelchenko, M. V., Borozan, I., et al. (2006) Genome-wide analysis of substrate specificities of the *Escherichia coli* haloacid dehalogenase-like phosphatase family. *J Biol Chem* 281: 36149–36161.

Manzano-Marín, A., Coeur d’acier, A., Clamens, A.-L., Orvain, C., Cruaud, C., Barbe, V., and Jousselin, E. (2018) A freeloader? The highly eroded yet large genome of the *Serratia symbiotica* symbiont of *Cinara strobil*. *Genome Biol Evol* 10: 2178–2189.

Manzano-Marín, A., Coeur d’acier, A., Clamens, A.-L., Orvain, C., Cruaud, C., Barbe, V., and Jousselin, E. (2020) Serial horizontal transfer of vitamin-biosynthetic genes enables the establishment of new nutritional symbionts in aphids’ di-symbiotic systems. *ISME J* 14: 259–273.

Oberhardt, M.A., Zarecki, R., Reshef, L., Xia, F., Duran-Frigola, M., Schreiber, R., Henry, C.S., Ben-Tal, N., Dwyer, D.J., Gophna, U., et al. (2016). Systems-Wide Prediction of Enzyme Promiscuity Reveals a New Underground Alternative Route for Pyridoxal 5’-Phosphate Production in *E. coli*. *PLOS Comput. Biol.* 12: e1004705.

Toenshoff, E.R., Gruber, D., and Horn, M. (2012). Co-evolution and symbiont replacement shaped the symbiosis between adelgids (Hemiptera: Adelgidae) and their bacterial symbionts. *Environ. Microbiol.* 14, 1284–1295.

von Dohlen, C.D., Spaulding, U., Patch, K.B., Weglarz, K.M., Footitt, R.G., Havill, N.P., and Burke, G.R. (2017). Dynamic Acquisition and Loss of Dual-Obligate Symbionts in the Plant-Sap-Feeding Adelgidae (Hemiptera: Sternorrhyncha: Aphidoidea). *Front Microbiol* 8:1037–1052.
